# Supplementary material for: Midbrain glutamatergic circuit mechanism of resilience to socially transferred allodynia in male mice
Source: PubMed Central journal article supplement (PMC11164890; doi:10.1038/s41467-024-49340-8), 2024-06-10
Supplement: 41467_2024_49340_MOESM1_ESM.pdf [file 41467_2024_49340_MOESM1_ESM.pdf]

**Midbrain glutamatergic circuit mechanism of resilience  
to socially transferred allodynia in male mice**

**SUPPLEMENTARY FIGURES AND TABLES**

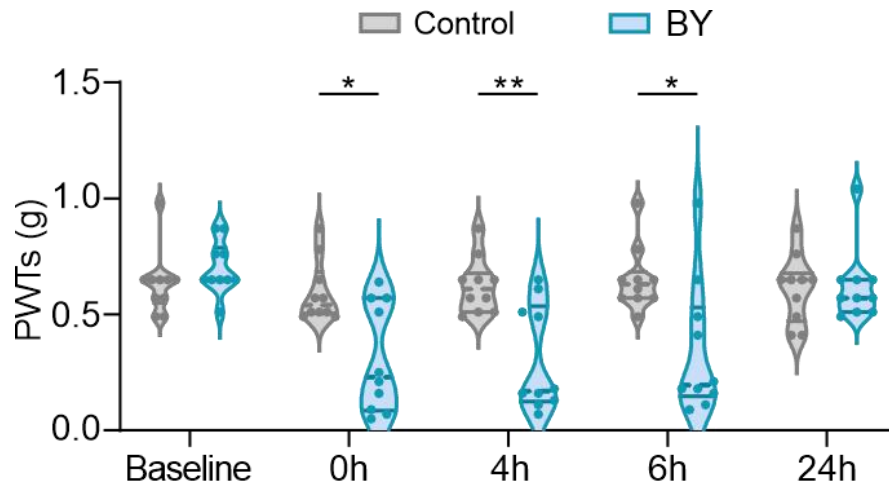

**Supplementary Fig. 1 | Time course and quantitative data of von Frey tests for PWTs at different time points before and after 1-hour social contact in control and bystander mice (Control,  $n = 10$  mice; BY,  $n = 10$  mice). Control versus BY,  $P_{BL} = 0.7615$ ,  $P_{0h} = 0.0243$ ,  $P_{4h} = 0.0089$ ,  $P_{6h} = 0.0481$ ,  $P_{24h} > 0.9999$ . BY, bystander mice. The data are presented as the mean  $\pm$  s.e.m. \* $P < 0.05$ , \*\* $P < 0.01$ . Data analyzed by Two-way ANOVA with Sidak's multiple comparisons test. Statistical details are presented in Supplementary Table 5. Source data are provided as a Source Data file.**

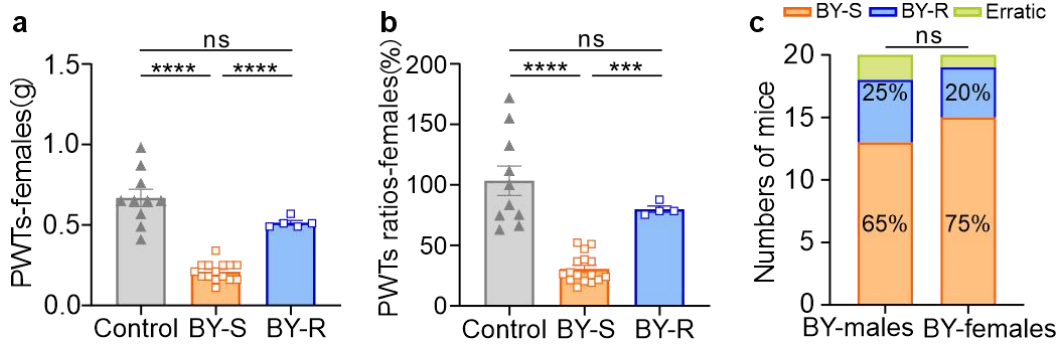

**Supplementary Fig. 2 | Segregation of susceptible and resilient subpopulations in female BY mice.** **a**, PWTs of female mice ( $n = 10, 15$  and  $5$  mice). Control versus BY-S,  $P = 2.9 \times 10^{-11}$ ; Control versus BY-R,  $P = 0.0530$ ; BY-S versus BY-R,  $P = 6.8 \times 10^{-7}$ . **b**, PWTs ratios of female mice ( $n = 10, 15$  and  $4$  mice). Control versus BY-S,  $P = 1.2 \times 10^{-7}$ ; Control versus BY-R,  $P = 0.3917$ ; BY-S versus BY-R,  $P = 0.0004$ . **c**, Percentages of BY-S and BY-R subpopulations in both male ( $n = 13, 5$  and  $2$  mice) and female mice ( $n = 15, 4$  and  $1$  mice).  $P = 0.7483$ . The data are presented as the mean  $\pm$  s.e.m.  $***P < 0.001$ ,  $****P < 0.0001$ , ns: no significance. Data analyzed by **(a, b)** one-way ANOVA with Tukey's multiple comparisons test; or **(c)** chi-square test. Statistical details are presented in Supplementary Table 5. Source data are provided as a Source Data file.

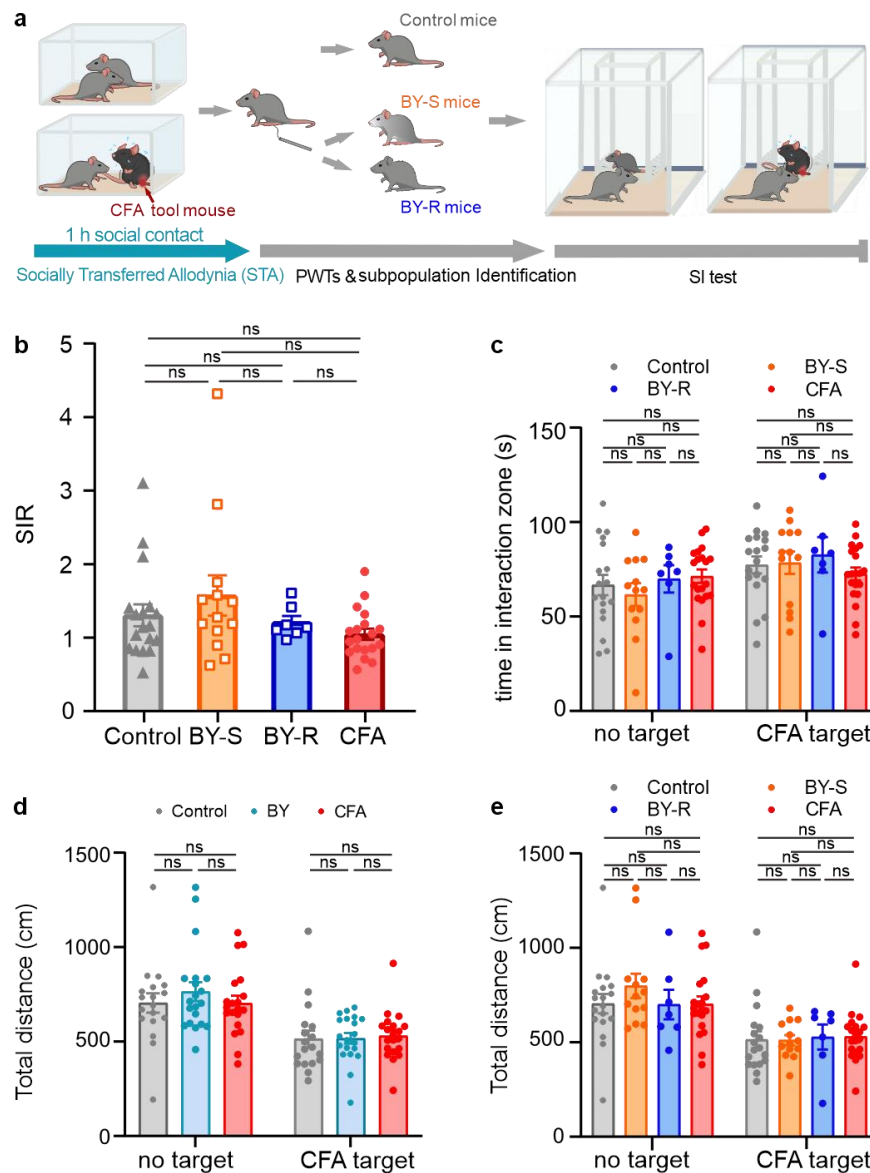

**Supplementary Fig. 3 | BY-S and By-R mice displayed similar social interaction with CFA mice.** **a**, Experimental timeline. **b**, Social interaction ratios ( $n = 18, 13, 7$  and  $20$  mice). **c**, Interaction zone time ( $n = 18, 13, 7$  and  $20$  mice). **d**, Total distance traveled ( $n = 18, 20$  and  $20$  mice). **e**, Total distance traveled ( $n = 18, 13, 7$  and  $20$  mice). SI, social interaction. The data are presented as the mean  $\pm$  s.e.m. Ns: no significance. Data analyzed by (**b**) Kruskal-Wallis test with Dunn's multiple comparisons test; or (**c, d, and e**) two-way RM ANOVA with Tukey's multiple comparisons test. Statistical details are presented in Supplementary Table 5. Source data are provided as a Source Data file.

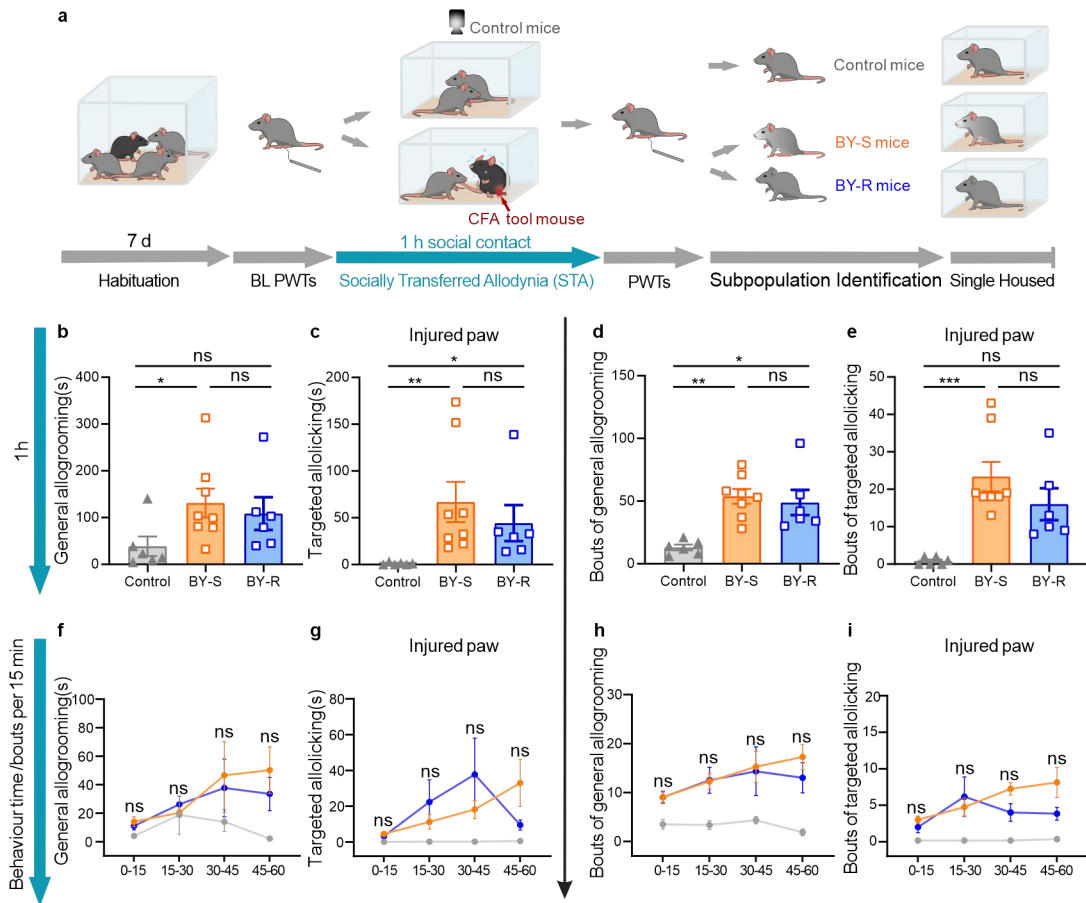

**Supplementary Fig. 4 | General allogrooming and targeted allolicking during the STA paradigm.** **a**, Experimental timeline. **b-e**, Total duration (**b**, **c**) and bouts number (**d**, **e**) of allogrooming and targeted allolicking behaviors during 1-hour STA ( $n = 6, 8$  and  $6$  mice). (**b**) Control versus BY-S,  $P = 0.0397$ ; (**c**) Control versus BY-S,  $P = 0.0020$ ; Control versus BY-R,  $P = 0.0288$ ; (**d**) Control versus BY-S,  $P = 0.0020$ ; Control versus BY-R,  $P = 0.0291$ ; (**e**) Control versus BY-S,  $P = 0.0010$ . **f-i**, Cumulative duration (**f**, **g**) and bout number (**h**, **i**) of allogrooming and targeted allolicking behaviors in BY-S, BY-R, and control mice measured every 15-minute ( $n = 6, 8$  and  $6$  mice). The data are expressed as the mean  $\pm$  s.e.m. \* $P < 0.05$ , \*\* $P < 0.01$ , \*\*\* $P < 0.001$ , ns: no significance. Data analyzed by (**b-e**) Kruskal-Wallis test with Dunn's multiple comparisons test; or (**f-i**) Two-way RM ANOVA with Tukey's post hoc test. Statistical details are presented in Supplementary Table 5. Source data are provided as a Source Data file.

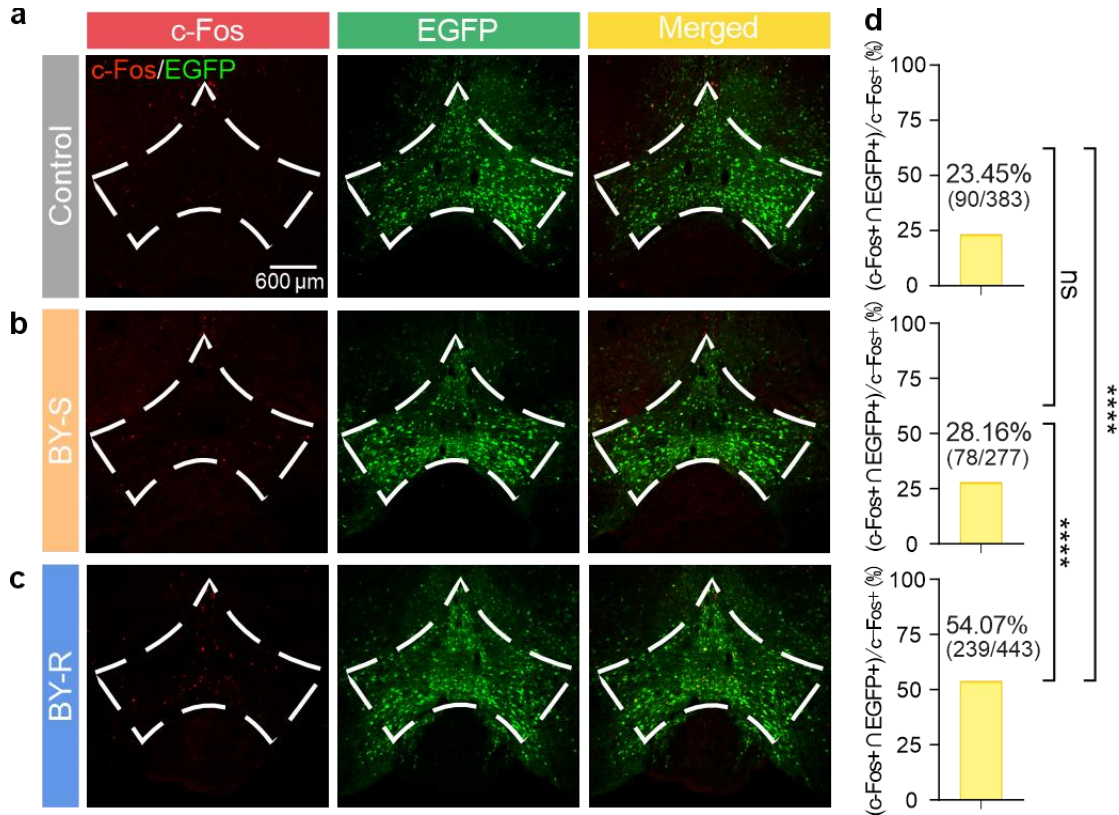

**Supplementary Fig. 5 | Specific activation of VTA glutamatergic neurons in the resilient mice.** **a**, Representative immunofluorescent images and the proportion of c-Fos protein expression in VTA glutamatergic neurons from control mice ( $n = 9$  slices from 3 mice). **b**, Representative immunofluorescent images and the proportion of c-Fos protein expression in VTA glutamatergic neurons from BY-S mice ( $n = 8$  slices from 3 mice). **c**, Representative immunofluorescent images and the proportion of c-Fos protein expression in VTA glutamatergic neurons from BY-R mice ( $n = 8$  slices from 3 mice). Three times the experiment was repeated with similar results. **d**, Quantitative data of A-C. Control versus BY-S,  $P = 0.1761$ ; Control versus BY-R,  $P < 0.0001$ ; BY-S versus BY-R,  $P = 8.1 \times 10^{-12}$ . Scale bar: 600  $\mu\text{m}$ . \*\*\*\* $P < 0.0001$ , ns: no significance. Data analyzed by Fisher's exact test. Statistical details are presented in Supplementary Table 5. Source data are provided as a Source Data file.

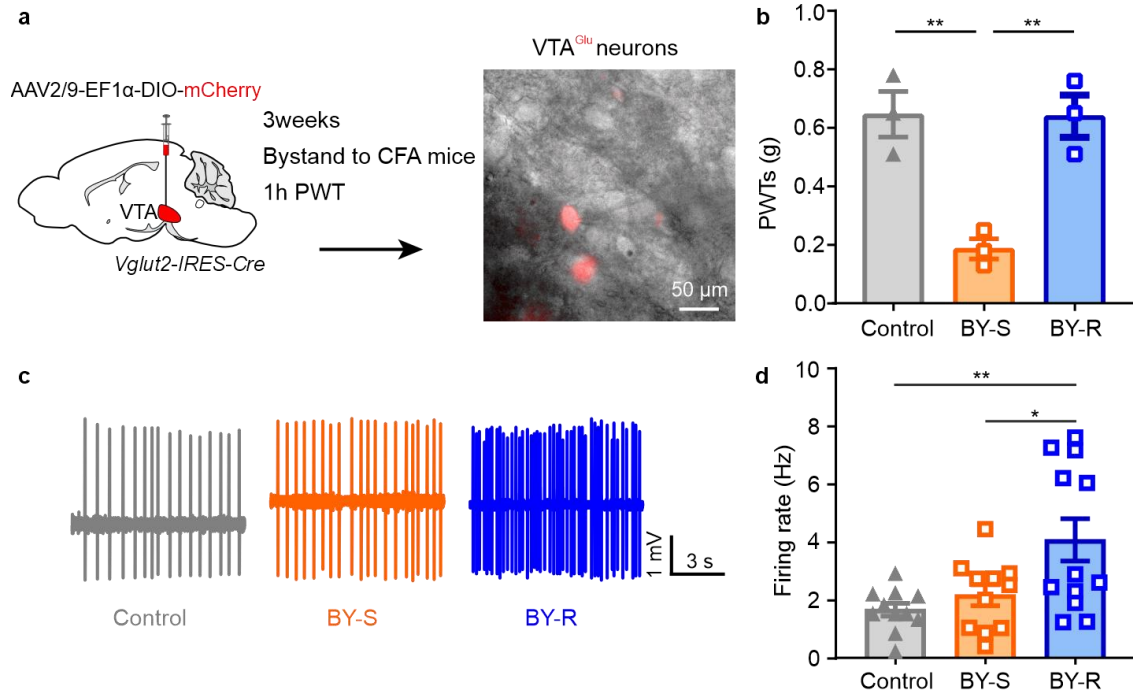

**Supplementary Fig. 6 | Increased firing activity in VTA glutamatergic neurons of the BY-R mice.** **a**, Schematic illustration depicting viral injection, experimental design, and representative image of mCherry-positive VTA vGluT2<sup>+</sup> cells during patch clamp recording (Adapted from "The Mouse Brain in Stereotaxic Coordinates" by Paxinos and Franklin). Scale bar: 50  $\mu$ m. **b**, PWTs ( $n = 3$  mice per group). Control versus BY-S,  $P = 0.0057$ ; BY-S versus BY-R,  $P = 0.0061$ . **c-d**, *In vitro* patch clamp sample traces (**c**) and firing rates (**d**) of VTA vGluT2<sup>+</sup> neurons ( $n = 11, 11, 12$  cells from 3, 3 and 3 mice). (**d**) Control versus BY-R,  $P = 0.0056$ ; BY-S versus BY-R,  $P = 0.0312$ . \* $P < 0.05$ , \*\* $P < 0.01$ . Data were analyzed by one-way ANOVA with Tukey's multiple comparisons test. Statistical details are presented in Supplementary Table 5. Source data are provided as a Source Data file.

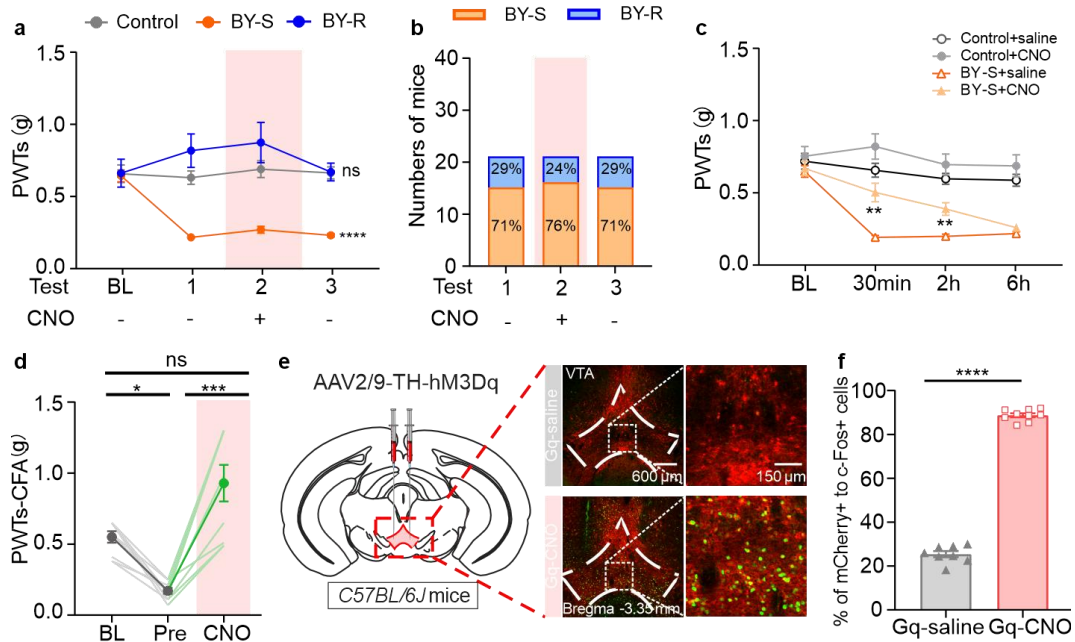

**Supplementary Fig. 7 | Activation of VTA dopaminergic neurons does not affect the development of STA.** **a**, PWTs across three repeats of social transfer of allodynia paradigm with or without chemogenetic activation of VTA dopaminergic neurons, subgroups of BY mice were identified following the first exposure to social contact with their CFA partners ( $n = 10, 14$  and  $5$  mice). Control versus BY-S,  $P_{BL} = 0.9744$ ,  $P_{T1} = 9.3 \times 10^{-6}$ ,  $P_{T2} = 7.0 \times 10^{-5}$ ,  $P_{T3} = 2.9 \times 10^{-6}$ ; Control versus BY-R,  $P_{BL} = 0.9993$ ,  $P_{T1} = 0.3638$ ,  $P_{T2} = 0.4906$ ,  $P_{T3} = 0.9964$ . **b**, Percentages of BY-S and BY-R mice across the three repeats of paradigm. **c**, PWTs over different time points before and after CNO injection in BY-S mice ( $n = 11, 10, 14$  and  $13$  mice). BY-S+saline versus BY-S+CNO,  $P_{BL} = 0.9871$ ,  $P_{30min} = 0.0019$ ,  $P_{2h} = 0.0047$ ,  $P_{6h} = 0.1871$ . **d**, PWTs for CFA mice at baseline, before, and after CNO injection ( $n = 9$  mice). BL versus Pre,  $P = 0.0201$ ; Pre versus CNO,  $P > 0.9999$ ; BL versus CNO,  $P = 0.0008$ . **e**, Schematic and representative immunofluorescent images illustrating c-Fos protein expression in mCherry-positive VTA dopaminergic neurons after saline and CNO treatment in C57BL/6J mice (Adapted from "The Mouse Brain in Stereotaxic Coordinates" by Paxinos and Franklin). Scale bar:  $600 \mu\text{m}$ ,  $150 \mu\text{m}$ . The staining was repeated three times with similar results. **f**, Quantitative data showing the percentage of mCherry and c-Fos double stained cells out of c-Fos protein-positive cells ( $n = 8, 9$  slices from 3 mice per group).  $t_{(15)} = 39.3$ ,  $P < 0.0001$ . The data are presented as the mean  $\pm$  s.e.m. \* $P < 0.05$ , \*\* $P < 0.01$ , \*\*\* $P < 0.001$ , \*\*\*\* $P < 0.0001$ , ns: no significance. Data analyzed by **(a, c)** Two-way RM ANOVA with Tukey's multiple comparisons test; **(b)** chi-square test; **(d)** two-sided Friedman test with Dunn's multiple comparisons test; or **(f)** unpaired two-sided  $t$ -test. Statistical details are presented in Supplementary Table 5. Source data are provided as a Source Data file.

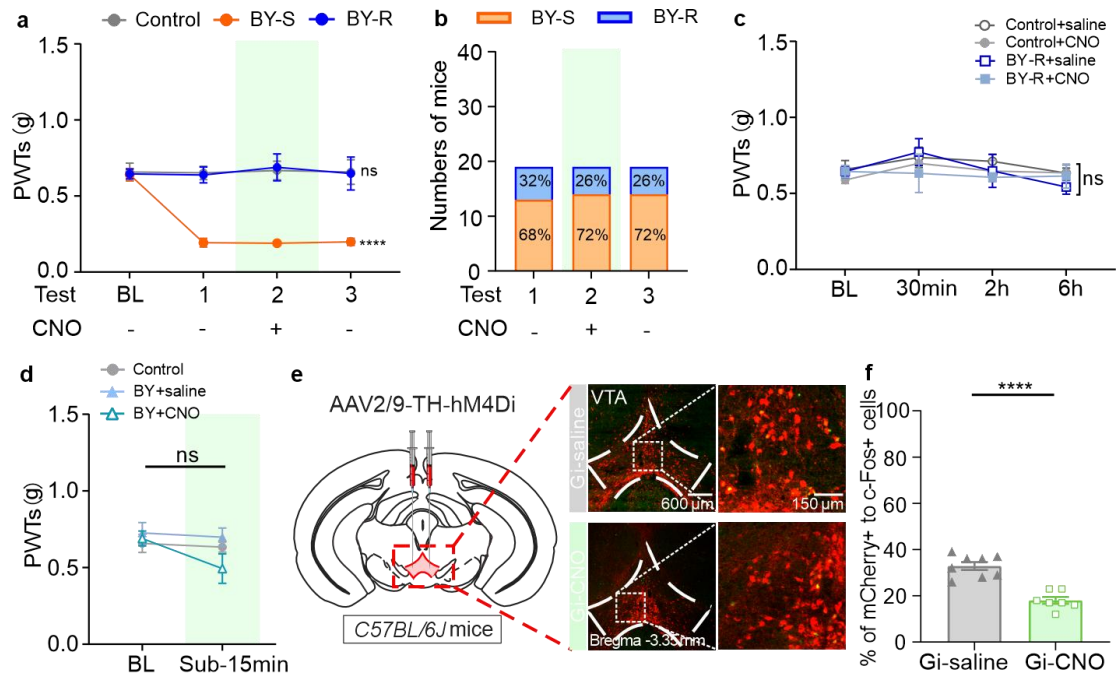

**Supplementary Fig. 8 | Inhibition of VTA dopaminergic neurons is not required for the development and maintenance of STA. a**, PWTs across three repeats of social transfer of allodynia paradigm with or without chemogenetic inhibition of VTA dopaminergic neurons, subgroups of bystander mice were identified following the first exposure to social contact with their CFA partners ( $n = 10, 13$  and  $6$  mice). Control versus BY-S,  $P = 0.9679$ ,  $P_{T1} = 4.5 \times 10^{-7}$ ,  $P_{T2} = 4.1 \times 10^{-5}$ ,  $P_{T3} = 0.0006$ ; Control versus BY-R,  $P_{BL} = 0.9795$ ,  $P_{T1} = 0.9780$ ,  $P_{T2} = 0.9786$ ,  $P_{T3} = 0.9899$ . **b**, Percentages of BY-S and BY-R mice across the three repeats of paradigm. **c**, PWTs over different time points before and after CNO injection in BY-R mice ( $n = 10, 10, 5$  and  $5$  mice). BY-R+saline versus BY-R+CNO,  $P_{BL} > 0.9999$ ,  $P_{30min} = 0.8007$ ,  $P_{2h} = 0.9800$ ,  $P_{6h} = 0.8603$ . **d**, PWTs after chemogenetic inhibition of VTA glutamatergic neurons during the sub-threshold paradigm ( $n = 10, 8$  and  $9$  mice). **e**, Schematic and representative immunofluorescent images illustrating c-Fos protein expression in mCherry-positive VTA dopaminergic neurons after saline and CNO treatment in C57BL/6J mice. Scale bar:  $600 \mu\text{m}$ ,  $150 \mu\text{m}$ . The staining was repeated three times with similar results (Adapted from "The Mouse Brain in Stereotaxic Coordinates" by Paxinos and Franklin). **f**, Quantitative data showing the percentage of mCherry and c-Fos double stained cells out of c-Fos protein-positive cells ( $n = 8, 7$  from 3 mice per group).  $t_{(13)} = 6.517$ ,  $P = 2.0 \times 10^{-5}$ . The data are presented as the mean  $\pm$  s.e.m.  $*P < 0.05$ ,  $**P < 0.01$ ,  $***P < 0.001$ ,  $****P < 0.0001$ , ns: no significance. Data analyzed by (**a, c, d**) Two-way RM ANOVA with Tukey's multiple comparisons test; (**b**) chi-square test; or (**f**) unpaired two-sided  $t$ -test. Statistical details are presented in Supplementary Table 5. Source data are provided as a Source Data file.



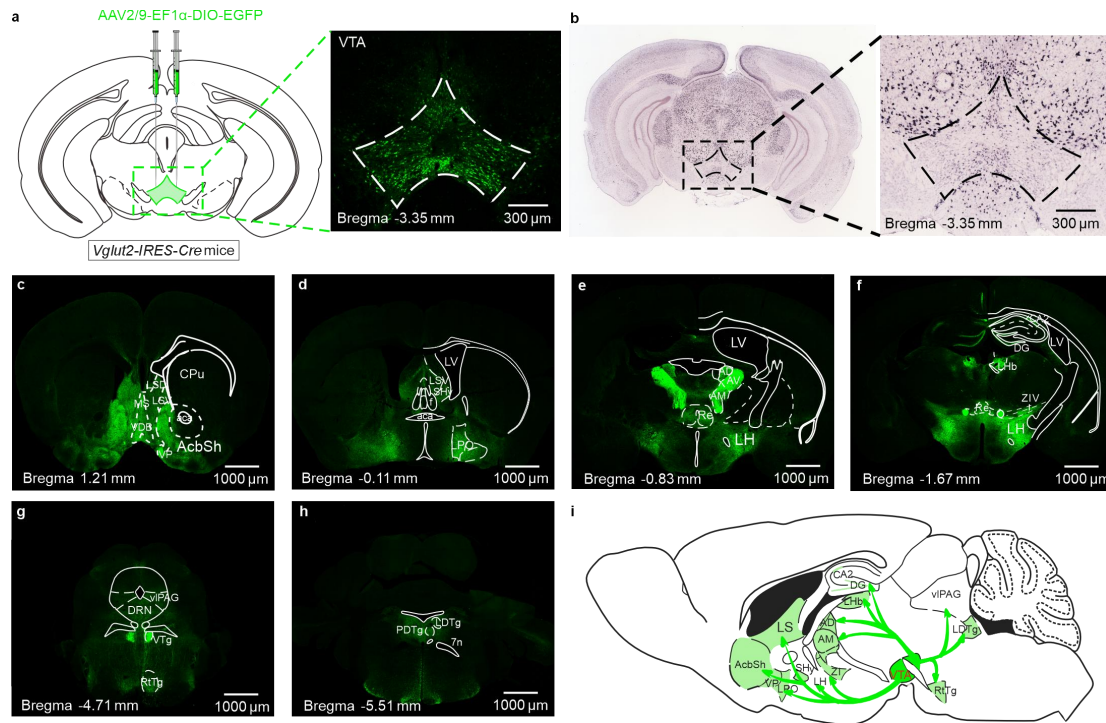

**Supplementary Fig. 9 | Identification of the downstream brain regions of VTA glutamatergic projections in *Vglut2-IRES-Cre* mice.** **a**, Schematic of viral injection (left) and representative neuronal EGFP expression in the VTA of *Vglut2-IRES-Cre* mice (right). Scale bar: 300  $\mu$ m. **b**, A representative in situ hybridization image showing the *Slc17a6* gene (*Vglut2*) expression in the VTA (E. S. Lein *et al.*, 2007). **c-h**, Representative immunofluorescent images showing EGFP-labeled fibers in the indicated regions. LS, lateral septum; CPu, caudate putamen; NAc, nucleus accumbens; VDB, the nucleus of the vertical limb of the diagonal band; LPO, lateral preoptic area; SHy, septohypothalamic nucleus; AD, anterodorsal thalamic nucleus; AV, anteroventral thalamic nucleus; AM, anteromedial thalamic nucleus; Re, reuniens thalamic nucleus; LH, lateral hypothalamic area; CA2, field CA2 of the hippocampus; DG, dentate gyrus; Lhb, lateral habenular nucleus; ZI, zona incerta; vIPAG, ventrolateral periaqueductal gray; DRN, dorsal raphe nucleus; RtTg, reticulotegmental nucleus of the pons; DTgP, dorsal tegmental nucleus, pericentral part. Scale bar: 1000  $\mu$ m. **i**, Schematic showing the VTA glutamatergic efferents. The staining was repeated twice with similar results. Figures adapted from "The Mouse Brain in Stereotaxic Coordinates" by Paxinos and Franklin.

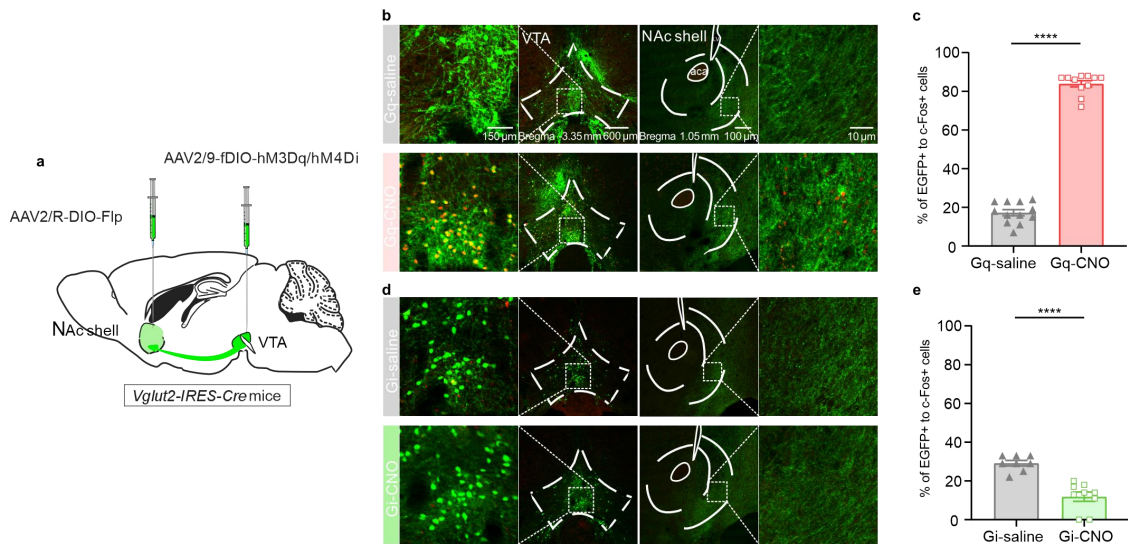

**Supplementary Fig. 10 | Chemogenetic manipulation of the VTA→NAc shell glutamatergic circuit bidirectionally regulate cell type-specific c-Fos protein expression.** **a**, Schematic showing viral injection surgeries (Adapted from "The Mouse Brain in Stereotaxic Coordinates" by Paxinos and Franklin). **b**, Representative immunofluorescent images illustrating c-Fos protein expression in EGFP-positive VTA glutamatergic neurons after saline or CNO treatment, and representative EGFP positive terminals in the NAc shell in *Vglut2-IRES-Cre* mice expressing hM3Dq in their VTA→NAc shell projecting glutamatergic neurons. Scale bar: 600  $\mu$ m, 150  $\mu$ m, 300  $\mu$ m and 40  $\mu$ m. The staining was repeated four times with similar results. **c**, Quantitative data of c-Fos protein expression in EYFP-positive VTA glutamatergic neurons ( $n = 12$ , 11 slices from 4 mice per group).  $U = 0$ ,  $P = 1.5 \times 10^{-6}$ . **d**, Representative immunofluorescent images illustrating c-Fos protein expression in EGFP-positive VTA glutamatergic neurons after saline or CNO treatment, and representative EGFP positive terminals in the NAc shell in *Vglut2-IRES-Cre* mice expressing hM4Di in their VTA→NAc shell projecting glutamatergic neurons. Three times the experiment was repeated with similar results. **e**, Quantitative data of c-Fos protein expression in EYFP-positive VTA glutamatergic neurons ( $n = 8$ , 9 from 3 mice per group).  $t_{(15)} = 5.935$ ,  $P = 2.7 \times 10^{-5}$ . The data are expressed as the mean  $\pm$  s.e.m. \*\*\*\* $P < 0.0001$ . Data analyzed by (c) Mann-Whitney test; or (e) unpaired two-sided  $t$ -test. Statistical details are presented in Supplementary Table 5. Source data are provided as a Source Data file.

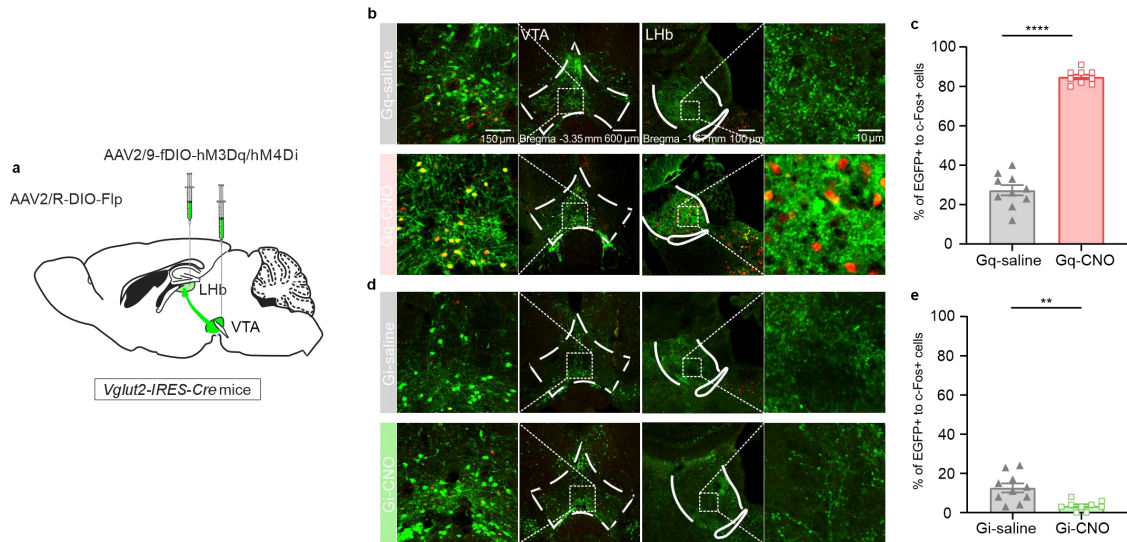

**Supplementary Fig. 11 | Chemogenetic manipulation of the VTA  $\rightarrow$  Lhb glutamatergic circuit bidirectionally regulate cell type-specific c-Fos protein expression.** **a**, Schematic showing viral injection surgeries (Adapted from "The Mouse Brain in Stereotaxic Coordinates" by Paxinos and Franklin). **b**, Representative immunofluorescent images illustrating c-Fos protein expression in EGFP-positive VTA glutamatergic neurons after saline or CNO treatment, and representative EGFP positive terminals in the NAc shell in *Vglut2-IRES-Cre* mice expressing hM3Dq in their VTA  $\rightarrow$  Lhb projecting glutamatergic neurons. Scale bar: 600  $\mu$ m, 150  $\mu$ m, 100  $\mu$ m and 10  $\mu$ m. **c**, Quantitative data of c-Fos protein expression in EYFP-positive VTA glutamatergic neurons ( $n = 10$ , 9 slices from 3 and 4 mice).  $t_{(17)} = 19.15$ ,  $P = 6.1 \times 10^{-13}$ . **d**, Representative immunofluorescent images illustrating c-Fos protein expression in EGFP-positive VTA glutamatergic neurons after saline or CNO treatment, and representative EGFP positive terminals in the Lhb in *Vglut2-IRES-Cre* mice expressing hM4Di in their VTA  $\rightarrow$  Lhb projecting glutamatergic neurons. **e**, Quantitative data of c-Fos protein expression in EYFP-positive VTA glutamatergic neurons ( $n = 8$ , 9 slices from 3 mice per group).  $t_{(17)} = 3.580$ ,  $P = 0.0023$ . The staining was repeated three times with similar results. The data are expressed as the mean  $\pm$  s.e.m. \*\*\*\* $P < 0.0001$ . Data analyzed by (**c**, **e**) unpaired two-sided  $t$ -test. Statistical details are presented in Supplementary Table 5. Source data are provided as a Source Data file.

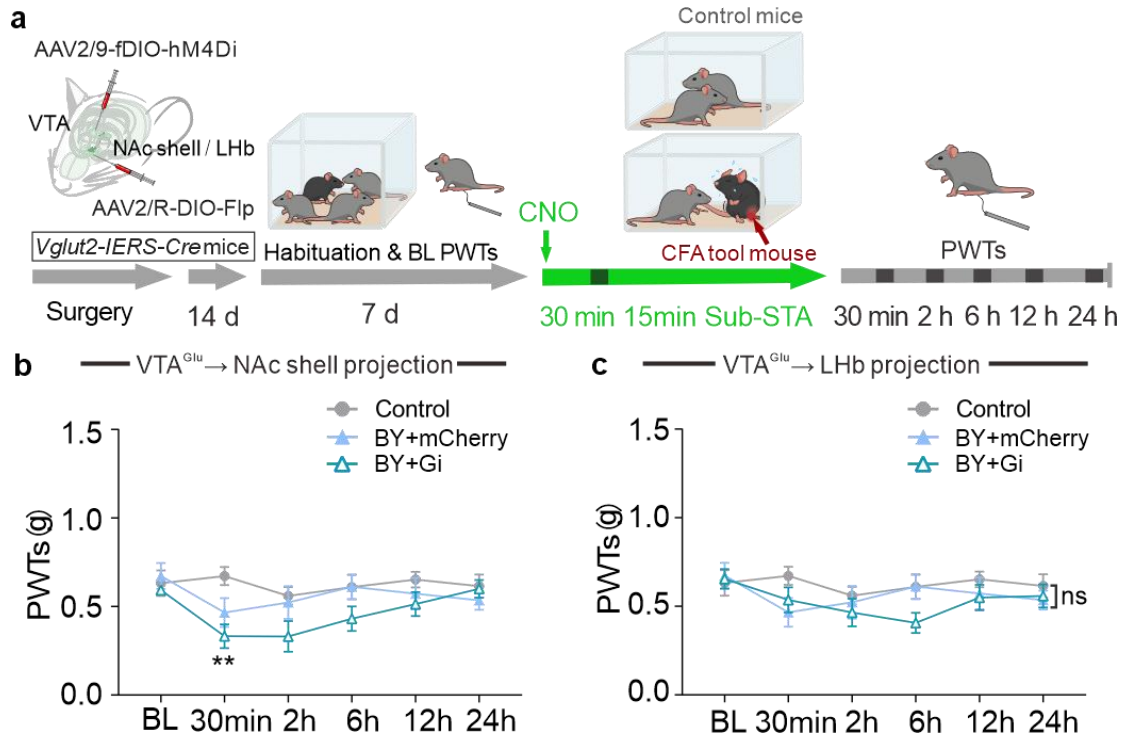

**Supplementary Fig. 12 | Chemogenetic activation of the VTA → NAc shell glutamatergic circuit, but not the VTA → LHb circuit, promotes the development of STA in mice undergone the subthreshold paradigm.** **a**, Experimental timeline. **b**, PWTs after chemogenetic inhibition of VTA → NAc shell-projecting glutamatergic neurons during the sub-threshold social contact ( $n = 9, 8$  and  $8$  mice). Control versus BY+Gi,  $P_{BL} = 0.8625$ ,  $P_{30min} = 0.0034$ ,  $P_{2h} = 0.0981$ ,  $P_{6h} = 0.1897$ ,  $P_{12h} = 0.2391$ ,  $P_{24h} = 0.9820$ . **c**, PWTs after chemogenetic inhibition of VTA → LHb shell-projecting glutamatergic neurons in a 15 min of sub-threshold paradigm ( $n = 10, 8$  and  $8$  mice). The data are expressed as the mean  $\pm$  s.e.m. **\*\*** $P < 0.01$ , ns: no significance. Data analyzed by **(p, q)** Two-way RM ANOVA with Tukey's multiple comparisons test. Statistical details are presented in Supplementary Table 5. Source data are provided as a Source Data file.

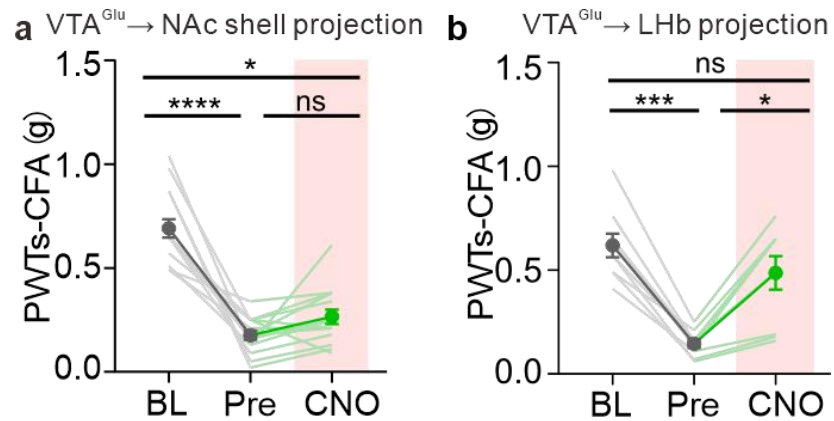

**Supplementary Fig. 13 | Chemogenetic activation of the VTA→LHb glutamatergic circuit, but not the VTA→NAc shell circuit, alleviates mechanical allodynia in CFA mice.** **a**, PWTs in CFA mice with and without chemogenetic activation of VTA → NAc shell glutamatergic projection ( $n = 15$  mice). BL versus Pre,  $P = 3.9 \times 10^{-6}$ ; Pre versus CNO,  $P = 0.0140$ ; BL versus CNO,  $P = 0.1338$ . **b**, PWTs in CFA mice with and without chemogenetic activation of the VTA→LHb glutamatergic projection ( $n = 9$  mice). BL versus Pre,  $P = 0.0008$ ; Pre versus CNO,  $P > 0.9999$ ; BL versus CNO,  $P = 0.0201$ . The data are expressed as the mean  $\pm$  s.e.m.  $**P < 0.01$ ,  $***P < 0.001$ ,  $****P < 0.0001$ , ns: no significance. Data analyzed by (**a, b**) Friedman test with Dunn's multiple comparisons test. Statistical details are presented in Supplementary Table 5. Source data are provided as a Source Data file.

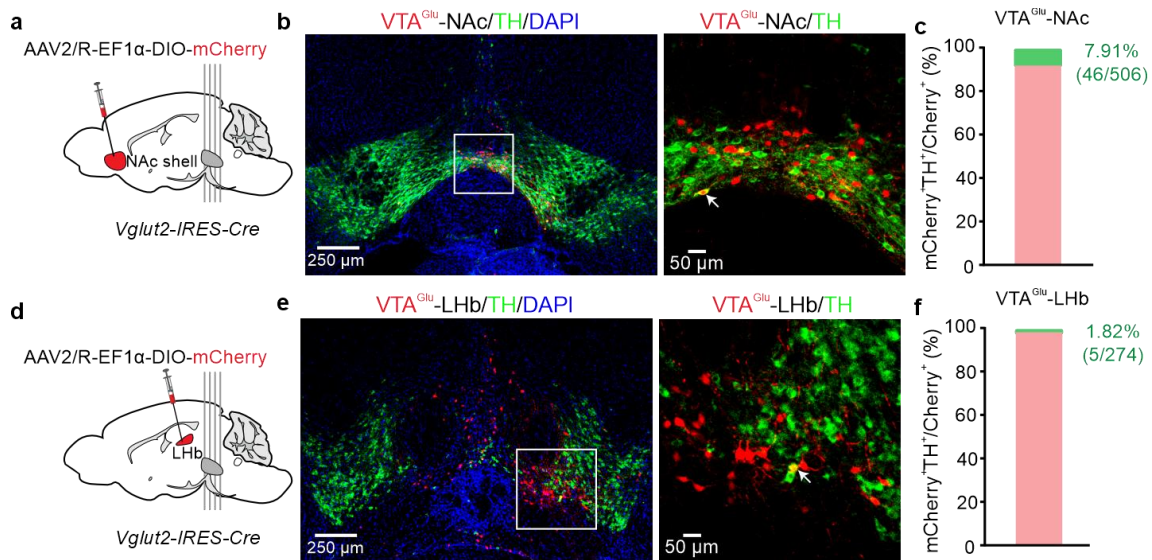

**Supplementary Fig. 14 | Co-expression of TH in VTA projecting glutamatergic neurons. a,** Schematic for retrograde AAV-DIO-mCherry injection into the NAc shell of *Vglut2-IRES-Cre* mice (Adapted from "The Mouse Brain in Stereotaxic Coordinates" by Paxinos and Franklin). **b and c,** Representative immunofluorescent images and quantitative data for co-expression of TH in VTA  $\rightarrow$  NAc shell projecting glutamatergic neurons. Scale bar: 250  $\mu$ m, 50  $\mu$ m. **d,** Schematic for retrograde AAV-DIO-mCherry injection into the LHb of *Vglut2-IRES-Cre* mice (Adapted from "The Mouse Brain in Stereotaxic Coordinates" by Paxinos and Franklin). **e and f,** Representative immunofluorescent images and quantitative data for co-expression of TH in VTA  $\rightarrow$  LHb projecting glutamatergic neurons. Scale bar: 250  $\mu$ m and 50  $\mu$ m. White arrows indicate VTA projecting glutamatergic neurons co-expressing TH. Three times the experiment was repeated with similar results.

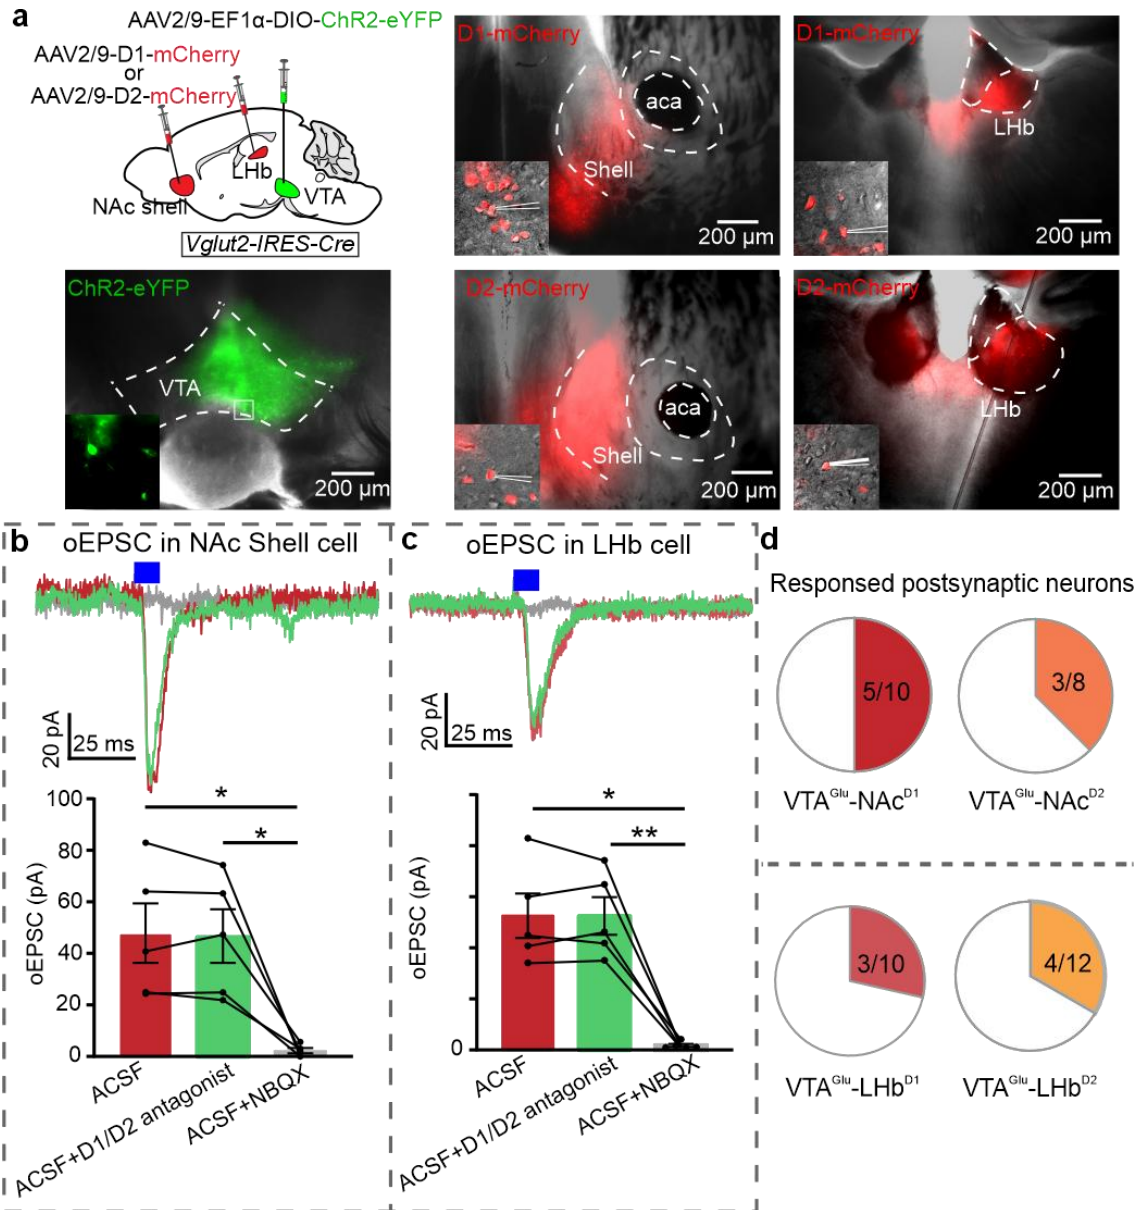

**Supplementary Fig. 15 | Postsynaptic characteristics of VTA glutamatergic neurons in NAc shell and LHB.** **a**, Schematic for anterograde AAV-DIO-ChR2-eYFP injection into the VTA and AAV-D1-mCherry or AAV-D2-mCherry into the NAc shell or LHB of *Vglut2-IRES-Cre* mice (Adapted from "The Mouse Brain in Stereotaxic Coordinates" by Paxinos and Franklin). Representative immunofluorescent images of virus expression in VTA, NAc and LHB were shown. Scale bar: 200  $\mu$ m. **b**, Representative responsive traces and quantitative data for optogenetic stimulation of VTA glutamatergic terminals in NAc shell neurons in the presence of ACSF, D1/D2 antagonist and NBQX, respectively ( $n = 5$  cells from 4 mice per group). ACSF versus ACSF+NBQX,  $P = 0.0111$ ; ACSF+D1/D2 antagonist versus ACSF+NBQX,  $P = 0.0131$ . **c**, Representative responsive traces and quantitative data for optogenetic stimulation of VTA glutamatergic terminals in LHB neurons in the presence of ACSF, D1/D2 antagonist and NBQX, respectively ( $n = 5$  cells from 4 mice per group). ACSF versus ACSF+NBQX,  $P = 0.0134$ ;

ACSF+D1/D2 antagonist versus ACSF+NBQX,  $P = 0.0075$ . **d**, Summary data of responded postsynaptic cells during optogenetic stimulation of VTA glutamatergic terminals in NAc shell and LHb. Scale bar: 200  $\mu\text{m}$ . The staining was repeated four times with similar results. The data are expressed as the mean  $\pm$  s.e.m.  $*P < 0.05$ ,  $**P < 0.01$ . Data analyzed by **(b, c)** one-way ANOVA with Tukey's multiple comparisons test. Statistical details are presented in Supplementary Table 5. Source data are provided as a Source Data file.



**Supplementary Table 1. Extended statistical information for Fig. 1c.**

|                      | Control | BY-S | BY-R |
|----------------------|---------|------|------|
| Sample Size          | 111     | 137  | 72   |
| 25% Percentile       | 0.5     | 0.13 | 0.57 |
| Median               | 0.61    | 0.18 | 0.65 |
| 75% Percentile       | 0.76    | 0.25 | 0.78 |
| Mean                 | 0.65    | 0.20 | 0.7  |
| Standard Deviation   | 0.20    | 0.09 | 0.17 |
| Standard Error       | 0.02    | 0.01 | 0.02 |
| Lower 95% CI of Mean | 0.61    | 0.18 | 0.66 |
| Upper 95% CI of Mean | 0.68    | 0.21 | 0.74 |

**Supplementary Table 2. Extended statistical information for Fig. 1e.**

|                      | Control | BY-S  | BY-R   |
|----------------------|---------|-------|--------|
| Sample Size          | 111     | 146   | 63     |
| 25% Percentile       | 78.46   | 24.14 | 87.69  |
| Median               | 100     | 32.48 | 100    |
| 75% Percentile       | 125     | 47.78 | 132.65 |
| Mean                 | 108.11  | 34.95 | 113.62 |
| Standard Deviation   | 43.39   | 16.60 | 35.72  |
| Standard Error       | 4.12    | 1.37  | 4.50   |
| Lower 95% CI of Mean | 99.94   | 32.24 | 104.63 |
| Upper 95% CI of Mean | 116.27  | 37.67 | 122.62 |

**Supplementary Table 3. Extended statistical information for Extended Data Fig. 2a.**

|                      | Control | BY-S | BY-R |
|----------------------|---------|------|------|
| Sample Size          | 10      | 15   | 5    |
| 25% Percentile       | 0.55    | 0.16 | 0.49 |
| Median               | 0.65    | 0.21 | 0.51 |
| 75% Percentile       | 0.79    | 0.25 | 0.54 |
| Mean                 | 0.67    | 0.21 | 0.51 |
| Standard Deviation   | 0.17    | 0.06 | 0.03 |
| Standard Error       | 0.05    | 0.01 | 0.01 |
| Lower 95% CI of Mean | 0.55    | 0.18 | 0.47 |
| Upper 95% CI of Mean | 0.79    | 0.24 | 0.55 |

**Supplementary Table 4. Extended statistical information for Extended Data Fig. 2B.**

|                      | Control | BY-S  | BY-R  |
|----------------------|---------|-------|-------|
| Sample Size          | 10      | 16    | 4     |
| 25% Percentile       | 72.62   | 21.46 | 76.15 |
| Median               | 91.83   | 25.87 | 78.46 |
| 75% Percentile       | 138.27  | 38.03 | 85.38 |
| Mean                 | 103.46  | 30.60 | 80.00 |
| Standard Deviation   | 38.45   | 11.68 | 5.33  |
| Standard Error       | 12.16   | 2.92  | 2.66  |
| Lower 95% CI of Mean | 75.96   | 24.37 | 71.52 |
| Upper 95% CI of Mean | 130.97  | 36.82 | 88.48 |

**Supplementary Table 5. Extended statistical information for Fig. 1-6, Extended Data Fig. 1-15.**

| Figure         | n/group                                                                | Primary statistic          | Post-hoc test  | Comparison               | p value | Notation | F/t statistic      |
|----------------|------------------------------------------------------------------------|----------------------------|----------------|--------------------------|---------|----------|--------------------|
| <b>Fig. 1c</b> | Control, n = 111 mice<br>BY-S, n = 137 mice<br>BY-R, n = 72 mice       | <i>Kruskal-Wallis test</i> | <i>Dunn's</i>  | Summary                  | <0.0001 | ****     | H = 236.5          |
|                | Control vs. BY-S                                                       |                            |                | <0.0001                  | ****    |          |                    |
|                | Control vs. BY-R                                                       |                            |                | 0.4058                   | ns      |          |                    |
|                | BY-S vs. BY-R                                                          |                            |                | <0.0001                  | ****    |          |                    |
| <b>Fig. 1e</b> | Control, n = 111 mice<br>BY-S, n = 146 mice<br>BY-R, n = 63 mice       | <i>Kruskal-Wallis test</i> | <i>Dunn's</i>  | Summary                  | <0.0001 | ****     | H = 234.3          |
|                | Control vs. BY-S                                                       |                            |                | <0.0001                  | ****    |          |                    |
|                | Control vs. BY-R                                                       |                            |                | 0.9796                   | ns      |          |                    |
|                | BY-S vs. BY-R                                                          |                            |                | <0.0001                  | ****    |          |                    |
| <b>Fig. 1g</b> | 1h, n = 40 mice<br>2h, n = 40 mice                                     | <i>chi-square test</i>     |                |                          | 0.7483  | ns       | $\chi^2 = 0.5800$  |
|                | 1h, BY-S n = 26 mice<br>1h, BY-R n = 11 mice<br>1h, Erratic n = 3 mice |                            |                |                          |         |          |                    |
|                | 2h, BY-S n = 24 mice<br>2h, BY-R n = 11 mice<br>2h, Erratic n = 5 mice |                            |                |                          |         |          |                    |
|                |                                                                        |                            |                |                          |         |          |                    |
| <b>Fig. 1i</b> | Control, n = 18 mice<br>BY-S, n = 13 mice<br>BY-R, n = 6 mice          | <i>Two-way RM ANOVA</i>    | <i>Sidak's</i> | Group × time interaction | 0.4879  | ns       | F (2, 34) = 0.7330 |
|                | Left vs. Right in Control                                              |                            |                | 0.5929                   | ns      |          |                    |
|                | Left vs. Right in BY-S                                                 |                            |                | 0.9995                   | ns      |          |                    |
|                | Left vs. Right in BY-R                                                 |                            |                | 0.8706                   | ns      |          |                    |

|                              |                                                                                   |                            |                |                            |                         |      |                   |
|------------------------------|-----------------------------------------------------------------------------------|----------------------------|----------------|----------------------------|-------------------------|------|-------------------|
| <b>Supplementary Fig. 1</b>  | Control, n = 10 mice<br>BY, n = 10 mice                                           | <i>Two-way ANOVA</i>       | <i>Sidak's</i> | Group × time interaction   | 3.5 x 10 <sup>-6</sup>  | **** | F (4, 72) = 9.418 |
|                              |                                                                                   |                            |                | Control vs. BY at Baseline | 0.7615                  | ns   |                   |
|                              |                                                                                   |                            |                | Control vs. BY at 0h       | 0.0243                  | *    |                   |
|                              |                                                                                   |                            |                | Control vs. BY at 4h       | 0.0089                  | **   |                   |
|                              |                                                                                   |                            |                | Control vs. BY at 6h       | 0.0481                  | *    |                   |
|                              |                                                                                   |                            |                | Control vs. BY at 24h      | >0.9999                 | ns   |                   |
| <b>Supplementary Fig. 2a</b> | Control, n = 10 mice<br>BY-S, n = 15 mice<br>BY-R, n = 5 mice                     | <i>One-way ANOVA</i>       | <i>Tukey's</i> | Main effect of group       | 2.3 x 10 <sup>-11</sup> | **** | F (2, 26) = 72.52 |
|                              |                                                                                   |                            |                | Control vs. BY-S           | 2.9 x 10 <sup>-11</sup> | **** |                   |
|                              |                                                                                   |                            |                | Control vs. BY-R           | 0.0530                  | ns   |                   |
|                              |                                                                                   |                            |                | BY-S vs. BY-R              | 6.8 x 10 <sup>-7</sup>  | **** |                   |
| <b>Supplementary Fig. 2b</b> | Control, n = 10 mice<br>BY-S, n = 16 mice<br>BY-R, n = 4 mice                     | <i>One-way ANOVA</i>       | <i>Tukey's</i> | Main effect of group       | 1.4 x 10 <sup>-7</sup>  | **** | F (2, 26) = 34.11 |
|                              |                                                                                   |                            |                | Control vs. BY-S           | 1.2 x 10 <sup>-7</sup>  | **** |                   |
|                              |                                                                                   |                            |                | Control vs. BY-R           | 0.3917                  | ns   |                   |
|                              |                                                                                   |                            |                | BY-S vs. BY-R              | 0.0004                  | ***  |                   |
| <b>Supplementary Fig. 2c</b> | male, n = 20 mice<br>female, n = 20 mice                                          | <i>chi-square test</i>     |                |                            | 0.7483                  | ns   | $\chi^2 = 0.5873$ |
|                              | male, BY-S n = 13 mice<br>male, BY-R n = 5 mice<br>male, Erratic n = 2 mice       |                            |                |                            |                         |      |                   |
|                              | female, BY-S n = 15 mice<br>female, BY-R n = 4 mice<br>female, Erratic n = 1 mice |                            |                |                            |                         |      |                   |
| <b>Supplementary</b>         | Control, n = 18 mice                                                              | <i>Kruskal-Wallis test</i> | <i>Dunn's</i>  | Summary                    | 0.1921                  | ns   | H = 4.738         |

|                              |                                                                                   |                         |                |                                   |         |    |                    |
|------------------------------|-----------------------------------------------------------------------------------|-------------------------|----------------|-----------------------------------|---------|----|--------------------|
| <b>Fig. 3b</b>               | BY-S, n = 13 mice<br>BY-R, n = 7 mice<br>CFA, n = 20 mice                         |                         |                |                                   |         |    |                    |
|                              |                                                                                   |                         |                | Control vs. BY-S                  | >0.9999 | ns |                    |
|                              |                                                                                   |                         |                | Control vs. BY-R                  | >0.9999 | ns |                    |
|                              |                                                                                   |                         |                | Control vs. CFA                   | >0.9999 | ns |                    |
|                              |                                                                                   |                         |                | BY-S vs. BY-R                     | >0.9999 | ns |                    |
|                              |                                                                                   |                         |                | BY-S vs. CFA                      | 0.2287  | ns |                    |
|                              |                                                                                   |                         |                | BY-R vs. CFA                      | >0.9999 | ns |                    |
| <b>Supplementary Fig. 3c</b> | Control, n = 18 mice<br>BY-S, n = 13 mice<br>BY-R, n = 7 mice<br>CFA, n = 20 mice | <i>Two-way RM ANOVA</i> | <i>Tukey's</i> | Group × time interaction          | 0.2559  | ns | F (3, 54) = 1.389  |
|                              |                                                                                   |                         |                | Control vs. BY-S with normal mice | 0.8914  | ns |                    |
|                              |                                                                                   |                         |                | Control vs. BY-R with normal mice | 0.9826  | ns |                    |
|                              |                                                                                   |                         |                | Control vs. CFA with normal mice  | 0.8851  | ns |                    |
|                              |                                                                                   |                         |                | BY-S vs. BY-R with normal mice    | 0.8018  | ns |                    |
|                              |                                                                                   |                         |                | BY-S vs. CFA with normal mice     | 0.5056  | ns |                    |
|                              |                                                                                   |                         |                | BY-R vs. CFA with normal mice     | 0.9984  | ns |                    |
|                              |                                                                                   |                         |                | Control vs. BY-S with CFA mice    | 0.9985  | ns |                    |
|                              |                                                                                   |                         |                | Control vs. BY-R with CFA mice    | 0.9271  | ns |                    |
|                              |                                                                                   |                         |                | Control vs. CFA with CFA mice     | 0.8786  | ns |                    |
|                              |                                                                                   |                         |                | BY-S vs. BY-R with CFA mice       | 0.9676  | ns |                    |
|                              |                                                                                   |                         |                | BY-S vs. CFA with CFA mice        | 0.8335  | ns |                    |
|                              |                                                                                   |                         |                | BY-R vs. CFA with CFA mice        | 0.6438  | ns |                    |
| <b>Supplementary Fig. 3d</b> | Control, n = 18 mice<br>BY, n = 20 mice<br>CFA, n = 20 mice                       | <i>Two-way RM ANOVA</i> | <i>Tukey's</i> | Group × time interaction          | 0.4725  | ns | F (2, 55) = 0.7601 |

|                              |                                                                                   |                            |                |                                   |         |    |                   |
|------------------------------|-----------------------------------------------------------------------------------|----------------------------|----------------|-----------------------------------|---------|----|-------------------|
|                              |                                                                                   |                            |                | Control vs. BY with normal mice   | 0.5609  | ns |                   |
|                              |                                                                                   |                            |                | Control vs. CFA with normal mice  | >0.9999 | ns |                   |
|                              |                                                                                   |                            |                | BY vs. CFA with normal mice       | 0.5375  | ns |                   |
|                              |                                                                                   |                            |                | Control vs. BY with CFA mice      | 0.9982  | ns |                   |
|                              |                                                                                   |                            |                | Control vs. CFA with CFA mice     | 0.9540  | ns |                   |
|                              |                                                                                   |                            |                | BY vs. CFA with CFA mice          | 0.9686  | ns |                   |
| <b>Supplementary Fig. 3e</b> | Control, n = 18 mice<br>BY-S, n = 13 mice<br>BY-R, n = 7 mice<br>CFA, n = 20 mice | <i>Two-way RM ANOVA</i>    | <i>Tukey's</i> | Group × time interaction          | 0.3901  | ns | F (3, 54) = 1.022 |
|                              |                                                                                   |                            |                | Control vs. BY-S with normal mice | 0.4782  | ns |                   |
|                              |                                                                                   |                            |                | Control vs. BY-R with normal mice | >0.9999 | ns |                   |
|                              |                                                                                   |                            |                | Control vs. CFA with normal mice  | >0.9999 | ns |                   |
|                              |                                                                                   |                            |                | BY-S vs. BY-R with normal mice    | 0.6520  | ns |                   |
|                              |                                                                                   |                            |                | BY-S vs. CFA with normal mice     | 0.4542  | ns |                   |
|                              |                                                                                   |                            |                | BY-R vs. CFA with normal mice     | >0.9999 | ns |                   |
|                              |                                                                                   |                            |                | Control vs. BY-S with CFA mice    | >0.9999 | ns |                   |
|                              |                                                                                   |                            |                | Control vs. BY-R with CFA mice    | 0.9981  | ns |                   |
|                              |                                                                                   |                            |                | Control vs. CFA with CFA mice     | 0.9913  | ns |                   |
|                              |                                                                                   |                            |                | BY-S vs. BY-R with CFA mice       | 0.9974  | ns |                   |
|                              |                                                                                   |                            |                | BY-S vs. CFA with CFA mice        | 0.9904  | ns |                   |
|                              |                                                                                   |                            |                | BY-R vs. CFA with CFA mice        | >0.9999 | ns |                   |
| <b>Supplementary Fig. 4b</b> | Control, n = 6 mice<br>BY-S, n = 8 mice<br>BY-R, n = 6 mice                       | <i>Kruskal-Wallis test</i> | <i>Dunn's</i>  | Summary                           | 0.0283  | *  | H = 6.690         |
|                              |                                                                                   |                            |                | Control vs. BY-S                  | 0.0397  | *  |                   |
|                              |                                                                                   |                            |                | Control vs. BY-R                  | 0.1529  | ns |                   |



|                              |                                                             |                            |                |                          |         |      |                    |
|------------------------------|-------------------------------------------------------------|----------------------------|----------------|--------------------------|---------|------|--------------------|
|                              |                                                             |                            |                | BY-S vs. BY-R            | >0.9999 | ns   |                    |
| <b>Supplementary Fig. 4c</b> | Control, n = 6 mice<br>BY-S, n = 8 mice<br>BY-R, n = 6 mice | <i>Kruskal-Wallis test</i> | <i>Dunn's</i>  | Summary                  | 0.0002  | ***  | H = 12.45          |
|                              |                                                             |                            |                | Control vs. BY-S         | 0.0020  | **   |                    |
|                              |                                                             |                            |                | Control vs. BY-R         | 0.0288  | *    |                    |
|                              |                                                             |                            |                | BY-S vs. BY-R            | >0.9999 | ns   |                    |
| <b>Supplementary Fig. 4d</b> | Control, n = 6 mice<br>BY-S, n = 8 mice<br>BY-R, n = 6 mice | <i>Kruskal-Wallis test</i> | <i>Dunn's</i>  | Summary                  | 0.0002  | ***  | H = 12.41          |
|                              |                                                             |                            |                | Control vs. BY-S         | 0.0020  | **   |                    |
|                              |                                                             |                            |                | Control vs. BY-R         | 0.0291  | *    |                    |
|                              |                                                             |                            |                | BY-S vs. BY-R            | >0.9999 | ns   |                    |
| <b>Supplementary Fig. 4e</b> | Control, n = 6 mice<br>BY-S, n = 8 mice<br>BY-R, n = 6 mice | <i>Kruskal-Wallis test</i> | <i>Dunn's</i>  | Summary                  | 0.00009 | **** | H = 13.21          |
|                              |                                                             |                            |                | Control vs. BY-S         | 0.0010  | ***  |                    |
|                              |                                                             |                            |                | Control vs. BY-R         | 0.0524  | ns   |                    |
|                              |                                                             |                            |                | BY-S vs. BY-R            | 0.8754  | ns   |                    |
| <b>Supplementary Fig. 4f</b> | Control, n = 6 mice<br>BY-S, n = 8 mice<br>BY-R, n = 6 mice | <i>Two-way RM ANOVA</i>    | <i>Tukey's</i> | Group × time interaction | 0.5337  | ns   | F (6, 51) = 0.8555 |
|                              |                                                             |                            |                | Control vs. BY-S at 0-15 | 0.0489  | *    |                    |
|                              |                                                             |                            |                | Control vs. BY-R at 0-15 | 0.1211  | ns   |                    |
|                              |                                                             |                            |                | BY-S vs. BY-R at 0-15    | 0.7792  | ns   |                    |

|                              |                                                             |                         |                |                           |        |    |                   |
|------------------------------|-------------------------------------------------------------|-------------------------|----------------|---------------------------|--------|----|-------------------|
|                              |                                                             |                         |                | Control vs. BY-S at 15-30 | 0.9928 | ns |                   |
|                              |                                                             |                         |                | Control vs. BY-R at 15-30 | 0.8690 | ns |                   |
|                              |                                                             |                         |                | BY-S vs. BY-R at 15-30    | 0.6340 | ns |                   |
|                              |                                                             |                         |                | Control vs. BY-S at 30-45 | 0.4251 | ns |                   |
|                              |                                                             |                         |                | Control vs. BY-R at 30-45 | 0.5386 | ns |                   |
|                              |                                                             |                         |                | BY-S vs. BY-R at 30-45    | 0.9577 | ns |                   |
|                              |                                                             |                         |                | Control vs. BY-S at 45-60 | 0.0509 | ns |                   |
|                              |                                                             |                         |                | Control vs. BY-R at 45-60 | 0.0950 | ns |                   |
|                              |                                                             |                         |                | BY-S vs. BY-R at 45-60    | 0.6921 | ns |                   |
| <b>Supplementary Fig. 4g</b> | Control, n = 6 mice<br>BY-S, n = 8 mice<br>BY-R, n = 6 mice | <i>Two-way RM ANOVA</i> | <i>Tukey's</i> | Group × time interaction  | 0.0558 | ns | F (6, 51) = 2.222 |
|                              |                                                             |                         |                | Control vs. BY-S at 0-15  | 0.0186 | *  |                   |
|                              |                                                             |                         |                | Control vs. BY-R at 0-15  | 0.1764 | ns |                   |
|                              |                                                             |                         |                | BY-S vs. BY-R at 0-15     | 0.7800 | ns |                   |
|                              |                                                             |                         |                | Control vs. BY-S at 15-30 | 0.0668 | ns |                   |
|                              |                                                             |                         |                | Control vs. BY-R at 15-30 | 0.2617 | ns |                   |
|                              |                                                             |                         |                | BY-S vs. BY-R at 15-30    | 0.6872 | ns |                   |
|                              |                                                             |                         |                | Control vs. BY-S at 30-45 | 0.0221 | *  |                   |
|                              |                                                             |                         |                | Control vs. BY-R at 30-45 | 0.2445 | ns |                   |
|                              |                                                             |                         |                | BY-S vs. BY-R at 30-45    | 0.6385 | ns |                   |
|                              |                                                             |                         |                | Control vs. BY-S at 45-60 | 0.0934 | ns |                   |
|                              |                                                             |                         |                | Control vs. BY-R at 45-60 | 0.0492 | *  |                   |
|                              |                                                             |                         |                | BY-S vs. BY-R at 45-60    | 0.2450 | ns |                   |
| <b>Supplementary Fig. 4h</b> | Control, n = 6 mice<br>BY-S, n = 8 mice<br>BY-R, n = 6 mice | <i>Two-way RM ANOVA</i> | <i>Tukey's</i> | Group × time interaction  | 0.2954 | ns | F (6, 51) = 1.253 |
|                              |                                                             |                         |                | Control vs. BY-S at 0-15  | 0.0153 | *  |                   |

|                              |                                                             |                            |                |                           |                         |      |                   |
|------------------------------|-------------------------------------------------------------|----------------------------|----------------|---------------------------|-------------------------|------|-------------------|
|                              |                                                             |                            |                | Control vs. BY-R at 0-15  | 0.0105                  | *    |                   |
|                              |                                                             |                            |                | BY-S vs. BY-R at 0-15     | >0.9999                 | ns   |                   |
|                              |                                                             |                            |                | Control vs. BY-S at 15-30 | 0.0015                  | **   |                   |
|                              |                                                             |                            |                | Control vs. BY-R at 15-30 | 0.0373                  | *    |                   |
|                              |                                                             |                            |                | BY-S vs. BY-R at 15-30    | 0.9964                  | ns   |                   |
|                              |                                                             |                            |                | Control vs. BY-S at 30-45 | 0.0264                  | *    |                   |
|                              |                                                             |                            |                | Control vs. BY-R at 30-45 | 0.2082                  | ns   |                   |
|                              |                                                             |                            |                | BY-S vs. BY-R at 30-45    | 0.9869                  | ns   |                   |
|                              |                                                             |                            |                | Control vs. BY-S at 45-60 | 0.0010                  | **   |                   |
|                              |                                                             |                            |                | Control vs. BY-R at 45-60 | 0.0330                  | *    |                   |
|                              |                                                             |                            |                | BY-S vs. BY-R at 45-60    | 0.5590                  | ns   |                   |
| <b>Supplementary Fig. 4i</b> | Control, n = 6 mice<br>BY-S, n = 8 mice<br>BY-R, n = 6 mice | <i>Two-way RM ANOVA</i>    | <i>Tukey's</i> | Group × time interaction  | 0.0308                  | *    | F (6, 51) = 2.552 |
|                              |                                                             |                            |                | Control vs. BY-S at 0-15  | 0.0014                  | **   |                   |
|                              |                                                             |                            |                | Control vs. BY-R at 0-15  | 0.1365                  | ns   |                   |
|                              |                                                             |                            |                | BY-S vs. BY-R at 0-15     | 0.5465                  | ns   |                   |
|                              |                                                             |                            |                | Control vs. BY-S at 15-30 | 0.0189                  | *    |                   |
|                              |                                                             |                            |                | Control vs. BY-R at 15-30 | 0.1621                  | ns   |                   |
|                              |                                                             |                            |                | BY-S vs. BY-R at 15-30    | 0.8853                  | ns   |                   |
|                              |                                                             |                            |                | Control vs. BY-S at 30-45 | 0.0001                  | ***  |                   |
|                              |                                                             |                            |                | Control vs. BY-R at 30-45 | 0.0544                  | ns   |                   |
|                              |                                                             |                            |                | BY-S vs. BY-R at 30-45    | 0.1214                  | ns   |                   |
|                              |                                                             |                            |                | Control vs. BY-S at 45-60 | 0.0164                  | *    |                   |
|                              |                                                             |                            |                | Control vs. BY-R at 45-60 | 0.0199                  | *    |                   |
|                              |                                                             |                            |                | BY-S vs. BY-R at 45-60    | 0.1885                  | ns   |                   |
| <b>Fig. 2b</b>               | Control, n = 35 mice<br>BY-S, n = 26 mice                   | <i>Kruskal-Wallis test</i> | <i>Dunn's</i>  | Summary                   | 1.0 x 10 <sup>-11</sup> | **** | H = 50.57         |

|                                    |                                                                |                            |                     |                      |                         |      |                   |
|------------------------------------|----------------------------------------------------------------|----------------------------|---------------------|----------------------|-------------------------|------|-------------------|
|                                    | BY-R, n = 12 mice                                              |                            |                     |                      |                         |      |                   |
|                                    |                                                                |                            |                     | Control vs. BY-S     | 8.2 x 10 <sup>-10</sup> | **** |                   |
|                                    |                                                                |                            |                     | Control vs. BY-R     | 0.9450                  | ns   |                   |
|                                    |                                                                |                            |                     | BY-S vs. BY-R        | 4.9 x 10 <sup>-8</sup>  | **** |                   |
| <b>Fig. 2c</b><br><b>ACC</b>       | Control, n = 19 mice<br>BY-S, n = 20 mice<br>BY-R, n = 23 mice | <i>Kruskal-Wallis test</i> | <i>Dunn's</i>       | Summary              | 0.0106                  | *    | H = 9.090         |
|                                    |                                                                |                            |                     | Control vs. BY-S     | 0.0078                  | **   |                   |
|                                    |                                                                |                            |                     | Control vs. BY-R     | 0.4076                  | ns   |                   |
|                                    |                                                                |                            |                     | BY-S vs. BY-R        | 0.3004                  | ns   |                   |
| <b>Fig. 2c</b><br><b>NAc</b>       | Control, n = 22 mice<br>BY-S, n = 13 mice<br>BY-R, n = 15 mice | <i>One-way ANOVA</i>       | <i>Holm-Sidak's</i> | Main effect of group | 0.0006                  | ***  | F (2, 47) = 8.723 |
|                                    |                                                                |                            |                     | Control vs. BY-S     | 0.0005                  | ***  |                   |
|                                    |                                                                |                            |                     | Control vs. BY-R     | 0.3700                  | ns   |                   |
|                                    |                                                                |                            |                     | BY-S vs. BY-R        | 0.0087                  | **   |                   |
| <b>Fig. 2c</b><br><b>NAc core</b>  | Control, n = 22 mice<br>BY-S, n = 13 mice<br>BY-R, n = 15 mice | <i>One-way ANOVA</i>       | <i>Holm-Sidak's</i> | Main effect of group | 0.0001                  | ***  | F (2, 47) = 10.89 |
|                                    |                                                                |                            |                     | Control vs. BY-S     | 0.0001                  | ***  |                   |
|                                    |                                                                |                            |                     | Control vs. BY-R     | 0.4640                  | ns   |                   |
|                                    |                                                                |                            |                     | BY-S vs. BY-R        | 0.0019                  | **   |                   |
| <b>Fig. 2c</b><br><b>NAc shell</b> | Control, n = 22 mice<br>BY-S, n = 13 mice<br>BY-R, n = 15 mice | <i>One-way ANOVA</i>       | <i>Holm-Sidak's</i> | Main effect of group | 0.0299                  | *    | F (2, 47) = 3.787 |
|                                    |                                                                |                            |                     | Control vs. BY-S     | 0.0286                  | *    |                   |
|                                    |                                                                |                            |                     | Control vs. BY-R     | 0.9307                  | ns   |                   |
|                                    |                                                                |                            |                     | BY-S vs. BY-R        | 0.0944                  | ns   |                   |

|                              |                      |                            |                     |                      |         |     |                   |
|------------------------------|----------------------|----------------------------|---------------------|----------------------|---------|-----|-------------------|
| <b>Fig. 2c</b><br><b>PVT</b> | Control, n = 15 mice | <i>One-way ANOVA</i>       | <i>Holm-Sidak's</i> | Main effect of group | 0.0012  | **  | F (2, 43) = 7.947 |
|                              | BY-S, n = 16 mice    |                            |                     | Control vs. BY-S     | 0.0126  | *   |                   |
|                              | BY-R, n = 15 mice    |                            |                     | Control vs. BY-R     | 0.0015  | **  |                   |
|                              |                      |                            |                     | BY-S vs. BY-R        | 0.8046  | ns  |                   |
| <b>Fig. 2c</b><br><b>BLA</b> | Control, n = 23 mice | <i>One-way ANOVA</i>       | <i>Holm-Sidak's</i> | Main effect of group | 0.0042  | **  | F (2, 61) = 5.982 |
|                              | BY-S, n = 19 mice    |                            |                     | Control vs. BY-S     | 0.0100  | *   |                   |
|                              | BY-R, n = 22 mice    |                            |                     | Control vs. BY-R     | 0.9998  | ns  |                   |
|                              |                      |                            |                     | BY-S vs. BY-R        | 0.0100  | *   |                   |
| <b>Fig. 2c</b><br><b>CeA</b> | Control, n = 23 mice | <i>Kruskal-Wallis test</i> | <i>Dunn's</i>       | Summary              | 0.0005  | *** | H = 15.36         |
|                              | BY-S, n = 20 mice    |                            |                     | Control vs. BY-S     | 0.0079  | **  |                   |
|                              | BY-R, n = 22 mice    |                            |                     | Control vs. BY-R     | >0.9999 | ns  |                   |
|                              |                      |                            |                     | BY-S vs. BY-R        | 0.0006  | *** |                   |
| <b>Fig. 2c</b><br><b>LHb</b> | Control, n = 21 mice | <i>One-way ANOVA</i>       | <i>Holm-Sidak's</i> | Main effect of group | 0.0205  | *   | F (2, 61) = 4.143 |
|                              | BY-S, n = 23 mice    |                            |                     | Control vs. BY-S     | 0.0695  | ns  |                   |
|                              | BY-R, n = 20 mice    |                            |                     | Control vs. BY-R     | 0.0310  | *   |                   |
|                              |                      |                            |                     | BY-S vs. BY-R        | 0.9680  | ns  |                   |
| <b>Fig. 2c</b><br><b>MD</b>  | Control, n = 20 mice | <i>Kruskal-Wallis test</i> | <i>Dunn's</i>       | Summary              | 0.0445  | *   | H = 6.226         |
|                              | BY-S, n = 22 mice    |                            |                     | Control vs. BY-S     | 0.0684  | ns  |                   |
|                              | BY-R, n = 19 mice    |                            |                     |                      |         |     |                   |

|                        |                                                                |                            |                     |                      |                      |      |                    |
|------------------------|----------------------------------------------------------------|----------------------------|---------------------|----------------------|----------------------|------|--------------------|
|                        |                                                                |                            |                     | Control vs. BY-R     | 0.1268               | ns   |                    |
|                        |                                                                |                            |                     | BY-S vs. BY-R        | >0.9999              | ns   |                    |
| <b>Fig. 2c<br/>Re</b>  | Control, n = 22 mice<br>BY-S, n = 22 mice<br>BY-R, n = 16 mice | <i>Kruskal-Wallis test</i> | <i>Dunn's</i>       | Summary              | $1.9 \times 10^{-5}$ | **** | H = 21.74          |
|                        |                                                                |                            |                     | Control vs. BY-S     | $2.5 \times 10^{-5}$ | **** |                    |
|                        |                                                                |                            |                     | Control vs. BY-R     | 0.0034               | **   |                    |
|                        |                                                                |                            |                     | BY-S vs. BY-R        | >0.9999              | ns   |                    |
| <b>Fig. 2c<br/>ZI</b>  | Control, n = 23 mice<br>BY-S, n = 21 mice<br>BY-R, n = 16 mice | <i>One-way ANOVA</i>       | <i>Holm-Sidak's</i> | Main effect of group | 0.4986               | ns   | F (2, 57) = 0.7045 |
|                        |                                                                |                            |                     | Control vs. BY-S     | 0.5633               | ns   |                    |
|                        |                                                                |                            |                     | Control vs. BY-R     | 0.9101               | ns   |                    |
|                        |                                                                |                            |                     | BY-S vs. BY-R        | 0.9477               | ns   |                    |
| <b>Fig. 2c<br/>LH</b>  | Control, n = 21 mice<br>BY-S, n = 16 mice<br>BY-R, n = 15 mice | <i>Kruskal-Wallis test</i> | <i>Dunn's</i>       | Summary              | 0.0011               | **   | H = 13.65          |
|                        |                                                                |                            |                     | Control vs. BY-S     | 0.0011               | **   |                    |
|                        |                                                                |                            |                     | Control vs. BY-R     | 0.0538               | ns   |                    |
|                        |                                                                |                            |                     | BY-S vs. BY-R        | 0.8511               | ns   |                    |
| <b>Fig. 2c<br/>PAG</b> | Control, n = 15 mice<br>BY-S, n = 18 mice<br>BY-R, n = 15 mice | <i>One-way ANOVA</i>       | <i>Holm-Sidak's</i> | Main effect of group | 0.0138               | *    | F (2, 45) = 4.715  |
|                        |                                                                |                            |                     | Control vs. BY-S     | 0.0314               | *    |                    |
|                        |                                                                |                            |                     | Control vs. BY-R     | 0.9995               | ns   |                    |
|                        |                                                                |                            |                     | BY-S vs. BY-R        | 0.0404               | *    |                    |
| <b>Fig. 2c<br/>DR</b>  | Control, n = 16 mice<br>BY-S, n = 18 mice                      | <i>One-way ANOVA</i>       | <i>Holm-Sidak's</i> | Main effect of group | $1.5 \times 10^{-5}$ | **** | F (2, 46) = 14.25  |

|                             |                                                                      |                            |                |                      |                      |      |                      |
|-----------------------------|----------------------------------------------------------------------|----------------------------|----------------|----------------------|----------------------|------|----------------------|
|                             | BY-R, n = 15 mice                                                    |                            |                |                      |                      |      |                      |
|                             |                                                                      |                            |                | Control vs. BY-S     | 0.0004               | ***  |                      |
|                             |                                                                      |                            |                | Control vs. BY-R     | 0.8490               | ns   |                      |
|                             |                                                                      |                            |                | BY-S vs. BY-R        | $4.1 \times 10^{-5}$ | **** |                      |
| <b>Fig. 2c</b><br><b>LC</b> | Control, n = 35 mice<br>BY-S, n = 30 mice<br>BY-R, n = 31 mice       | <i>Kruskal-Wallis test</i> | <i>Dunn's</i>  | Summary              | $6.2 \times 10^{-6}$ | **** | H = 23.98            |
|                             |                                                                      |                            |                | Control vs. BY-S     | $3.9 \times 10^{-6}$ | **** |                      |
|                             |                                                                      |                            |                | Control vs. BY-R     | 0.0104               | *    |                      |
|                             |                                                                      |                            |                | BY-S vs. BY-R        | 0.1778               | ns   |                      |
| <b>Fig. 2e</b>              | Control, n = 22 slices<br>BY-S, n = 25 slices<br>BY-R, n = 33 slices | <i>Kruskal-Wallis test</i> | <i>Dunn's</i>  | Summary              | $1.7 \times 10^{-7}$ | **** | H = 31.23            |
|                             |                                                                      |                            |                | Control vs. BY-S     | 0.2586               | ns   |                      |
|                             |                                                                      |                            |                | Control vs. BY-R     | $2.5 \times 10^{-7}$ | **** |                      |
|                             |                                                                      |                            |                | BY-S vs. BY-R        | 0.0007               | ***  |                      |
| <b>Fig. 2g</b>              | Control, n = 7 slices<br>BY-S, n = 9 slices<br>BY-R, n = 7 slices    | <i>One-way ANOVA</i>       | <i>Tukey's</i> | Main effect of group | 0.9945               | ns   | F (2, 20) = 0.005533 |
|                             |                                                                      |                            |                | Control vs. BY-S     | 0.9995               | ns   |                      |
|                             |                                                                      |                            |                | Control vs. BY-R     | 0.9998               | ns   |                      |
|                             |                                                                      |                            |                | BY-S vs. BY-R        | >0.9999              | ns   |                      |
| <b>Fig. 2i</b>              | Control, n = 9 slices<br>BY-S, n = 9 slices<br>BY-R, n = 11 slices   | <i>One-way ANOVA</i>       | <i>Tukey's</i> | Main effect of group | 0.0855               | ns   | F (2, 26) = 2.707    |
|                             |                                                                      |                            |                | Control vs. BY-S     | 0.0707               | ns   |                      |
|                             |                                                                      |                            |                | Control vs. BY-R     | 0.3702               | ns   |                      |
|                             |                                                                      |                            |                | BY-S vs. BY-R        | 0.5458               | ns   |                      |

|                              |                                                 |                                      |                |                          |                  |                         |                   |                    |
|------------------------------|-------------------------------------------------|--------------------------------------|----------------|--------------------------|------------------|-------------------------|-------------------|--------------------|
| <b>Fig. 2k</b>               | Control, n = 9 slices                           | <i>Kruskal-Wallis test</i>           | <i>Dunn's</i>  | Summary                  | 0.0004           | ***                     | H = 15.80         |                    |
|                              | BY-S, n = 8 slices                              |                                      |                |                          |                  |                         |                   |                    |
|                              | BY-R, n = 8 slices                              |                                      |                |                          |                  |                         |                   |                    |
|                              |                                                 |                                      |                |                          |                  |                         |                   |                    |
|                              |                                                 |                                      |                |                          | Control vs. BY-S | >0.9999                 | ns                |                    |
|                              |                                                 |                                      |                |                          | Control vs. BY-R | 0.0017                  | **                |                    |
|                              |                                                 |                                      |                |                          | BY-S vs. BY-R    | 0.0015                  | **                |                    |
| <b>Supplementary Fig. 5d</b> | Control, n = 9 slices / mice                    | <i>Two-sided Fisher's exact test</i> |                |                          | 0.1761           | ns                      |                   |                    |
|                              | BY-S, n = 8 slices / mice                       |                                      |                |                          |                  |                         |                   |                    |
|                              | Control, n = 9 slices / mice                    |                                      |                |                          |                  |                         |                   |                    |
|                              | BY-R, n = 8 slices / mice                       |                                      |                |                          |                  |                         |                   |                    |
|                              |                                                 |                                      |                |                          |                  | <0.0001                 | ****              |                    |
|                              |                                                 |                                      |                |                          |                  | 8.1 x 10 <sup>-12</sup> | ****              |                    |
| <b>Supplementary Fig. 6b</b> | Control, n = 3 mice                             | <i>One-way ANOVA</i>                 | <i>Tukey's</i> | Main effect of group     | 0.0036           | **                      | F (2, 6) = 16.66  |                    |
|                              | BY-S, n = 3 slices                              |                                      |                |                          |                  |                         |                   |                    |
|                              | BY-R, n = 3 slices                              |                                      |                |                          |                  |                         |                   |                    |
|                              |                                                 |                                      |                |                          |                  |                         |                   |                    |
|                              |                                                 |                                      |                |                          | Control vs. BY-S | 0.0057                  | **                |                    |
|                              |                                                 |                                      |                |                          | Control vs. BY-R | 0.9971                  | ns                |                    |
|                              |                                                 |                                      |                |                          | BY-S vs. BY-R    | 0.0061                  | **                |                    |
| <b>Supplementary Fig. 6d</b> | Control, n = 11 cells/ 3mice                    | <i>One-way ANOVA</i>                 | <i>Tukey's</i> | Main effect of group     | 0.0047           | **                      | F (2, 31) = 6.403 |                    |
|                              | BY-S, n = 11 cells/ 3mice                       |                                      |                |                          |                  |                         |                   |                    |
|                              | BY-R, n = 12 cells/ 3mice                       |                                      |                |                          |                  |                         |                   |                    |
|                              |                                                 |                                      |                |                          |                  |                         |                   |                    |
|                              |                                                 |                                      |                |                          | Control vs. BY-S | 0.7750                  | ns                |                    |
|                              |                                                 |                                      |                |                          | Control vs. BY-R | 0.0056                  | **                |                    |
|                              |                                                 |                                      |                |                          | BY-S vs. BY-R    | 0.0312                  | *                 |                    |
| <b>Fig. 3c</b>               | Gq-saline, n = 6 slices<br>Gq-CNO, n = 4 slices | <i>Unpaired Two-sided t-test</i>     |                |                          |                  | 1.6 x 10 <sup>-7</sup>  | ****              | t (8) = 23.35      |
| <b>Fig. 3d</b>               | Control, n = 13 mice<br>BY-S, n = 17 mice       | <i>Two-way RM ANOVA</i>              | <i>Tukey's</i> | Group × time interaction |                  | 4.5 x 10 <sup>-6</sup>  | ****              | F (6, 102) = 6.787 |



|  | BY-R, n = 7 mice |  |  |                            |                        |      |
|--|------------------|--|--|----------------------------|------------------------|------|
|  |                  |  |  | Control vs. BY-S at BL     | 0.8990                 | ns   |
|  |                  |  |  | Control vs. BY-R at BL     | 0.9152                 | ns   |
|  |                  |  |  | BY-S vs. BY-R at BL        | 0.6928                 | ns   |
|  |                  |  |  | Control vs. BY-S at Test 1 | 1.4 x 10 <sup>-5</sup> | **** |
|  |                  |  |  | Control vs. BY-R at Test 1 | 0.7226                 | ns   |
|  |                  |  |  | BY-S vs. BY-R at Test 1    | 0.0004                 | ***  |
|  |                  |  |  | Control vs. BY-S at Test 2 | 0.9706                 | ns   |
|  |                  |  |  | Control vs. BY-R at Test 2 | 0.5950                 | ns   |
|  |                  |  |  | BY-S vs. BY-R at Test 2    | 0.5239                 | ns   |
|  |                  |  |  | Control vs. BY-S at Test 3 | 2.9 x 10 <sup>-5</sup> | **** |
|  |                  |  |  | Control vs. BY-R at Test 3 | 0.5041                 | ns   |
|  |                  |  |  | BY-S vs. BY-R at Test 3    | 0.0002                 | ***  |
|  |                  |  |  | Control BL vs. Test 1      | 0.9928                 | ns   |
|  |                  |  |  | Control BL vs. Test 2      | 0.9602                 | ns   |
|  |                  |  |  | Control BL vs. Test 3      | 0.9685                 | ns   |
|  |                  |  |  | Control Test 1 vs. Test 2  | 0.6196                 | ns   |
|  |                  |  |  | Control Test 1 vs. Test 3  | >0.9999                | ns   |
|  |                  |  |  | Control Test 2 vs. Test 3  | 0.6447                 | ns   |
|  |                  |  |  | BY-S BL vs. Test 1         | 2.7 x 10 <sup>-6</sup> | **** |
|  |                  |  |  | BY-S BL vs. Test 2         | 0.9547                 | ns   |
|  |                  |  |  | BY-S BL vs. Test 3         | 2.3 x 10 <sup>-5</sup> | **** |
|  |                  |  |  | BY-S Test 1 vs. Test 2     | 0.0007                 | ***  |
|  |                  |  |  | BY-S Test 1 vs. Test 3     | 0.7365                 | ns   |
|  |                  |  |  | BY-S Test 2 vs. Test 3     | 0.0009                 | ***  |
|  |                  |  |  | BY-R BL vs. Test 1         | 0.9970                 | ns   |
|  |                  |  |  | BY-R BL vs. Test 2         | 0.7560                 | ns   |
|  |                  |  |  | BY-R BL vs. Test 3         | 0.7639                 | ns   |

|                |                                                                   |                                                |  |                        |         |     |                  |
|----------------|-------------------------------------------------------------------|------------------------------------------------|--|------------------------|---------|-----|------------------|
|                |                                                                   |                                                |  | BY-R Test 1 vs. Test 2 | 0.8122  | ns  |                  |
|                |                                                                   |                                                |  | BY-R Test 1 vs. Test 3 | 0.3557  | ns  |                  |
|                |                                                                   |                                                |  | BY-R Test 2 vs. Test 3 | 0.9266  | ns  |                  |
| <b>Fig. 3e</b> | Test 1, n = 24 mice<br>Test 2, n = 24 mice<br>Test 3, n = 24 mice | <i>chi-square test</i>                         |  |                        | 0.0002  | *** | $\chi^2 = 17.46$ |
|                | Test 1, BY-S n = 17 mice<br>Test 1, BY-R n = 7 mice               |                                                |  |                        |         |     |                  |
|                | Test 2, BY-S n = 4 mice<br>Test 2, BY-R n = 20 mice               |                                                |  |                        |         |     |                  |
|                | Test 3, BY-S n = 16 mice<br>Test 3, BY-R n = 8 mice               |                                                |  |                        |         |     |                  |
| <b>Fig. 3e</b> | Test 1, n = 24 mice<br>Test 2, n = 24 mice                        | <i>Two-sided</i><br><i>Fisher's exact test</i> |  |                        | 0.0004  | *** |                  |
|                | Test 1, BY-S n = 17 mice<br>Test 1, BY-R n = 7 mice               |                                                |  |                        |         |     |                  |
|                | Test 2, BY-S n = 4 mice<br>Test 2, BY-R n = 20 mice               |                                                |  |                        |         |     |                  |
| <b>Fig. 3e</b> | Test 1, n = 24 mice<br>Test 3, n = 24 mice                        | <i>Two-sided</i><br><i>Fisher's exact test</i> |  |                        | >0.9999 | ns  |                  |
|                | Test 1, BY-S n = 17 mice<br>Test 1, BY-R n = 7 mice               |                                                |  |                        |         |     |                  |
|                | Test 3, BY-S n = 16 mice<br>Test 3, BY-R n = 8 mice               |                                                |  |                        |         |     |                  |
| <b>Fig. 3e</b> | Test 2, n = 24 mice<br>Test 3, n = 24 mice                        | <i>Two-sided</i><br><i>Fisher's exact test</i> |  |                        | 0.0010  | **  |                  |
|                | Test 2, BY-S n = 4 mice<br>Test 2, BY-R n = 20 mice               |                                                |  |                        |         |     |                  |

|                |                                                                                                              |                         |                |                                         |                        |      |                    |
|----------------|--------------------------------------------------------------------------------------------------------------|-------------------------|----------------|-----------------------------------------|------------------------|------|--------------------|
|                | Test 3, BY-S n = 16 mice<br>Test 3, BY-R n = 8 mice                                                          |                         |                |                                         |                        |      |                    |
| <b>Fig. 3g</b> | Control+saline, n = 10 mice<br>Control+CNO, n = 10 mice<br>BY-S+saline, n = 10 mice<br>BY-S+CNO, n = 10 mice | <i>Two-way RM ANOVA</i> | <i>Tukey's</i> | Group × time interaction                | 1.6 x 10 <sup>-7</sup> | **** | F (9, 108) = 6.645 |
|                |                                                                                                              |                         |                | Control+saline vs. Control+CNO at BL    | >0.9999                | ns   |                    |
|                |                                                                                                              |                         |                | Control+saline vs. BY-S+saline at BL    | 0.9990                 | ns   |                    |
|                |                                                                                                              |                         |                | Control+saline vs. BY-S+CNO at BL       | 0.9990                 | ns   |                    |
|                |                                                                                                              |                         |                | Control+CNO vs. BY-S+saline at BL       | 0.9990                 | ns   |                    |
|                |                                                                                                              |                         |                | Control+CNO vs. BY-S+CNO at BL          | 0.9990                 | ns   |                    |
|                |                                                                                                              |                         |                | BY-S+saline vs. BY-S+CNO at BL          | >0.9999                | ns   |                    |
|                |                                                                                                              |                         |                | Control+saline vs. Control+CNO at 30min | 0.9710                 | ns   |                    |
|                |                                                                                                              |                         |                | Control+saline vs. BY-S+saline at 30min | 0.0014                 | **   |                    |
|                |                                                                                                              |                         |                | Control+saline vs. BY-S+CNO at 30min    | >0.9999                | ns   |                    |
|                |                                                                                                              |                         |                | Control+CNO vs. BY-S+saline at 30min    | 0.0002                 | ***  |                    |
|                |                                                                                                              |                         |                | Control+CNO vs. BY-S+CNO at 30min       | 0.9851                 | ns   |                    |
|                |                                                                                                              |                         |                | BY-S+saline vs. BY-S+CNO at 30min       | 0.0034                 | **   |                    |
|                |                                                                                                              |                         |                | Control+saline vs. Control+CNO at 2h    | 0.8953                 | ns   |                    |
|                |                                                                                                              |                         |                | Control+saline vs. BY-S+saline at 2h    | 0.0001                 | ***  |                    |
|                |                                                                                                              |                         |                | Control+saline vs. BY-S+CNO at 2h       | 0.0758                 | ns   |                    |
|                |                                                                                                              |                         |                | Control+CNO vs. BY-S+saline at 2h       | 1.6 x 10 <sup>-6</sup> | **** |                    |
|                |                                                                                                              |                         |                | Control+CNO vs. BY-S+CNO at 2h          | 0.1264                 | ns   |                    |
|                |                                                                                                              |                         |                | BY-S+saline vs. BY-S+CNO at 2h          | 0.1688                 | ns   |                    |
|                |                                                                                                              |                         |                | Control+saline vs. Control+CNO at 6h    | 0.9996                 | ns   |                    |
|                |                                                                                                              |                         |                | Control+saline vs. BY-S+saline at 6h    | 0.0006                 | ***  |                    |
|                |                                                                                                              |                         |                | Control+saline vs. BY-S+CNO at 6h       | 0.0006                 | ***  |                    |
|                |                                                                                                              |                         |                | Control+CNO vs. BY-S+saline at 6h       | 0.0003                 | ***  |                    |

|                |                                                               |                                      |                |                                |                       |      |                   |
|----------------|---------------------------------------------------------------|--------------------------------------|----------------|--------------------------------|-----------------------|------|-------------------|
|                |                                                               |                                      |                | Control+CNO vs. BY-S+CNO at 6h | 0.0003                | ***  |                   |
|                |                                                               |                                      |                | BY-S+saline vs. BY-S+CNO at 6h | 0.9816                | ns   |                   |
| <b>Fig. 3h</b> | n = 12 mice                                                   | <i>Two-sided<br/>Friedman test</i>   | <i>Dunn's</i>  | Summary                        | 0.0002                | ***  | Q = 17.15         |
|                |                                                               |                                      |                | BL vs. Pre                     | 0.0005                | ***  |                   |
|                |                                                               |                                      |                | BL vs. CNO                     | >0.9999               | ns   |                   |
|                |                                                               |                                      |                | Pre vs. CNO                    | 0.0033                | **   |                   |
| <b>Fig. 4c</b> | Gi-saline, n = 6 slices<br>Gi-CNO, n = 6 slices               | <i>Unpaired Two-sided<br/>t-test</i> |                |                                | $1.1 \times 10^{-6}$  | **** | t (10) = 10.44    |
| <b>Fig. 4d</b> | Control, n = 10 mice<br>BY-S, n = 17 mice<br>BY-R, n = 9 mice | <i>Two-way RM ANOVA</i>              | <i>Tukey's</i> | Group × time interaction       | $9.0 \times 10^{-15}$ | **** | F (6, 99) = 19.24 |
|                |                                                               |                                      |                | Control vs. BY-S at BL         | >0.9999               | ns   |                   |
|                |                                                               |                                      |                | Control vs. BY-R at BL         | 0.7498                | ns   |                   |
|                |                                                               |                                      |                | BY-S vs. BY-R at BL            | 0.6595                | ns   |                   |
|                |                                                               |                                      |                | Control vs. BY-S at Test 1     | $4.4 \times 10^{-6}$  | **** |                   |
|                |                                                               |                                      |                | Control vs. BY-R at Test 1     | 0.6023                | ns   |                   |
|                |                                                               |                                      |                | BY-S vs. BY-R at Test 1        | $2.1 \times 10^{-7}$  | **** |                   |
|                |                                                               |                                      |                | Control vs. BY-S at Test 2     | 0.0015                | **   |                   |
|                |                                                               |                                      |                | Control vs. BY-R at Test 2     | 0.0018                | **   |                   |
|                |                                                               |                                      |                | BY-S vs. BY-R at Test 2        | 0.8071                | ns   |                   |
|                |                                                               |                                      |                | Control vs. BY-S at Test 3     | $6.8 \times 10^{-6}$  | **** |                   |
|                |                                                               |                                      |                | Control vs. BY-R at Test 3     | 0.5510                | ns   |                   |
|                |                                                               |                                      |                | BY-S vs. BY-R at Test 3        | 0.0003                | ***  |                   |
|                |                                                               |                                      |                | Control BL vs. Test 1          | 0.6015                | ns   |                   |
|                |                                                               |                                      |                | Control BL vs. Test 2          | 0.8455                | ns   |                   |
|                |                                                               |                                      |                | Control BL vs. Test 3          | 0.5258                | ns   |                   |
|                |                                                               |                                      |                | Control Test 1 vs. Test 2      | 0.9782                | ns   |                   |

|                |                                                                   |                                          |  |                           |                      |      |                  |
|----------------|-------------------------------------------------------------------|------------------------------------------|--|---------------------------|----------------------|------|------------------|
|                |                                                                   |                                          |  | Control Test 1 vs. Test 3 | 0.9778               | ns   |                  |
|                |                                                                   |                                          |  | Control Test 2 vs. Test 3 | 0.9319               | ns   |                  |
|                |                                                                   |                                          |  | BY-S BL vs. Test 1        | $3.2 \times 10^{-7}$ | **** |                  |
|                |                                                                   |                                          |  | BY-S BL vs. Test 2        | $1.3 \times 10^{-7}$ | **** |                  |
|                |                                                                   |                                          |  | BY-S BL vs. Test 3        | $1.5 \times 10^{-7}$ | **** |                  |
|                |                                                                   |                                          |  | BY-S Test 1 vs. Test 2    | 0.6984               | ns   |                  |
|                |                                                                   |                                          |  | BY-S Test 1 vs. Test 3    | 0.7986               | ns   |                  |
|                |                                                                   |                                          |  | BY-S Test 2 vs. Test 3    | 0.9904               | ns   |                  |
|                |                                                                   |                                          |  | BY-R BL vs. Test 1        | 0.8641               | ns   |                  |
|                |                                                                   |                                          |  | BY-R BL vs. Test 2        | 0.0053               | **   |                  |
|                |                                                                   |                                          |  | BY-R BL vs. Test 3        | 0.9190               | ns   |                  |
|                |                                                                   |                                          |  | BY-R Test 1 vs. Test 2    | 0.0002               | ***  |                  |
|                |                                                                   |                                          |  | BY-R Test 1I vs. Test 3   | 0.9957               | ns   |                  |
|                |                                                                   |                                          |  | BY-R Test 2 vs. Test 3    | 0.0021               | **   |                  |
| <b>Fig. 4e</b> | Test 1, n = 26 mice<br>Test 2, n = 26 mice<br>Test 3, n = 26 mice | <i>chi-square test</i>                   |  |                           | 0.0041               | **   | $\chi^2 = 10.98$ |
|                | Test 1, BY-S n = 17 mice<br>Test 1, BY-R n = 9 mice               |                                          |  |                           |                      |      |                  |
|                | Test 2, BY-S n = 26 mice<br>Test 2, BY-R n = 0 mice               |                                          |  |                           |                      |      |                  |
|                | Test 3, BY-S n = 18 mice<br>Test 3, BY-R n = 8 mice               |                                          |  |                           |                      |      |                  |
| <b>Fig. 4e</b> | Test 1, n = 26 mice<br>Test 2, n = 26 mice                        | <i>Two-sided<br/>Fisher's exact test</i> |  |                           | 0.0017               | **   |                  |
|                | Test 1, BY-S n = 17 mice<br>Test 1, BY-R n = 9 mice               |                                          |  |                           |                      |      |                  |
|                | Test 2, BY-S n = 26 mice                                          |                                          |  |                           |                      |      |                  |

|                |                                                                                                           |                                                |                |                                         |                        |      |                    |
|----------------|-----------------------------------------------------------------------------------------------------------|------------------------------------------------|----------------|-----------------------------------------|------------------------|------|--------------------|
|                | Test 2, BY-R n = 0 mice                                                                                   |                                                |                |                                         |                        |      |                    |
| <b>Fig. 4e</b> | Test 1, n = 26 mice<br>Test 3, n = 26 mice                                                                | <i>Two-sided</i><br><i>Fisher's exact test</i> |                |                                         | >0.9999                | ns   |                    |
|                | Test 1, BY-S n = 17 mice<br>Test 1, BY-R n = 9 mice                                                       |                                                |                |                                         |                        |      |                    |
|                | Test 3, BY-S n = 18 mice<br>Test 3, BY-R n = 8 mice                                                       |                                                |                |                                         |                        |      |                    |
| <b>Fig. 4e</b> | Test 2, n = 26 mice<br>Test 3, n = 26 mice                                                                | <i>Two-sided</i><br><i>Fisher's exact test</i> |                |                                         | 0.0042                 | **   |                    |
|                | Test 2, BY-S n = 26 mice<br>Test 2, BY-R n = 0 mice                                                       |                                                |                |                                         |                        |      |                    |
|                | Test 3, BY-S n = 18 mice<br>Test 3, BY-R n = 8 mice                                                       |                                                |                |                                         |                        |      |                    |
| <b>Fig. 4g</b> | Control+saline, n = 9 mice<br>Control+CNO, n = 13 mice<br>BY-R+saline, n = 9 mice<br>BY-R+CNO, n = 8 mice | <i>Two-way RM ANOVA</i>                        | <i>Tukey's</i> | Group × time interaction                | 0.0005                 | ***  | F (9, 105) = 3.682 |
|                |                                                                                                           |                                                |                | Control+saline vs. Control+CNO at BL    | 0.9556                 | ns   |                    |
|                |                                                                                                           |                                                |                | Control+saline vs. BY-R+saline at BL    | 0.8416                 | ns   |                    |
|                |                                                                                                           |                                                |                | Control+saline vs. BY-R+CNO at BL       | 0.9837                 | ns   |                    |
|                |                                                                                                           |                                                |                | Control+CNO vs. BY-R+saline at BL       | 0.9710                 | ns   |                    |
|                |                                                                                                           |                                                |                | Control+CNO vs. BY-R+CNO at BL          | 0.7588                 | ns   |                    |
|                |                                                                                                           |                                                |                | BY-R+saline vs. BY-R+CNO at BL          | 0.5942                 | ns   |                    |
|                |                                                                                                           |                                                |                | Control+saline vs. Control+CNO at 30min | 0.5518                 | ns   |                    |
|                |                                                                                                           |                                                |                | Control+saline vs. BY-R+saline at 30min | 0.8409                 | ns   |                    |
|                |                                                                                                           |                                                |                | Control+saline vs. BY-R+CNO at 30min    | 0.0012                 | **   |                    |
|                |                                                                                                           |                                                |                | Control+CNO vs. BY-R+saline at 30min    | 0.9853                 | ns   |                    |
|                |                                                                                                           |                                                |                | Control+CNO vs. BY-R+CNO at 30min       | 6.8 x 10 <sup>-5</sup> | **** |                    |

|                |                                                                    |                         |                |                                      |                        |      |                     |
|----------------|--------------------------------------------------------------------|-------------------------|----------------|--------------------------------------|------------------------|------|---------------------|
|                |                                                                    |                         |                | BY-R+saline vs. BY-R+CNO at 30min    | 0.0017                 | **   |                     |
|                |                                                                    |                         |                | Control+saline vs. Control+CNO at 2h | 0.9974                 | ns   |                     |
|                |                                                                    |                         |                | Control+saline vs. BY-R+saline at 2h | 0.9471                 | ns   |                     |
|                |                                                                    |                         |                | Control+saline vs. BY-R+CNO at 2h    | 0.0129                 | *    |                     |
|                |                                                                    |                         |                | Control+CNO vs. BY-R+saline at 2h    | 0.9648                 | ns   |                     |
|                |                                                                    |                         |                | Control+CNO vs. BY-R+CNO at 2h       | 0.0015                 | **   |                     |
|                |                                                                    |                         |                | BY-R+saline vs. BY-R+CNO at 2h       | 0.2435                 | ns   |                     |
|                |                                                                    |                         |                | Control+saline vs. Control+CNO at 6h | 0.9952                 | ns   |                     |
|                |                                                                    |                         |                | Control+saline vs. BY-R+saline at 6h | 0.9757                 | ns   |                     |
|                |                                                                    |                         |                | Control+saline vs. BY-R+CNO at 6h    | 0.9979                 | ns   |                     |
|                |                                                                    |                         |                | Control+CNO vs. BY-R+saline at 6h    | 0.9928                 | ns   |                     |
|                |                                                                    |                         |                | Control+CNO vs. BY-R+CNO at 6h       | >0.9999                | ns   |                     |
|                |                                                                    |                         |                | BY-R+saline vs. BY-R+CNO at 6h       | 0.9935                 | ns   |                     |
| <b>Fig. 4i</b> | Control, n = 9 mice<br>BY+saline, n = 8 mice<br>BY+CNO, n = 8 mice | <i>Two-way RM ANOVA</i> | <i>Tukey's</i> | Group × time interaction             | 0.0022                 | **   | F (10, 115) = 2.988 |
|                |                                                                    |                         |                | Control vs. BY+saline at BL          | 0.9637                 | ns   |                     |
|                |                                                                    |                         |                | Control vs. BY+CNO at BL             | 0.9082                 | ns   |                     |
|                |                                                                    |                         |                | BY+saline vs. BY+CNO at BL           | 0.9978                 | ns   |                     |
|                |                                                                    |                         |                | Control vs. BY+saline at 30min       | 0.0904                 | ns   |                     |
|                |                                                                    |                         |                | Control vs. BY+CNO at 30min          | 2.2 x 10 <sup>-5</sup> | **** |                     |
|                |                                                                    |                         |                | BY+saline vs. BY+CNO at 30min        | 0.0616                 | ns   |                     |
|                |                                                                    |                         |                | Control vs. BY+saline at 2h          | 0.9708                 | ns   |                     |
|                |                                                                    |                         |                | Control vs. BY+CNO at 2h             | 0.0324                 | *    |                     |
|                |                                                                    |                         |                | BY+saline vs. BY+CNO at 2h           | 0.1158                 | ns   |                     |
|                |                                                                    |                         |                | Control vs. BY+saline at 6h          | >0.9999                | ns   |                     |
|                |                                                                    |                         |                | Control vs. BY+CNO at 6h             | 0.0647                 | ns   |                     |
|                |                                                                    |                         |                | BY+saline vs. BY+CNO at 6h           | 0.0839                 | ns   |                     |

|                              |                                                               |                         |                |                              |                      |      |                   |
|------------------------------|---------------------------------------------------------------|-------------------------|----------------|------------------------------|----------------------|------|-------------------|
|                              |                                                               |                         |                | Control vs. BY+saline at 12h | 0.7856               | ns   |                   |
|                              |                                                               |                         |                | Control vs. BY+CNO at 12h    | 0.0284               | *    |                   |
|                              |                                                               |                         |                | BY+saline vs. BY+CNO at 12h  | 0.2523               | ns   |                   |
|                              |                                                               |                         |                | Control vs. BY+saline at 24h | 0.7824               | ns   |                   |
|                              |                                                               |                         |                | Control vs. BY+CNO at 24h    | 0.9961               | ns   |                   |
|                              |                                                               |                         |                | BY+saline vs. BY+CNO at 24h  | 0.9023               | ns   |                   |
| <b>Supplementary Fig. 7a</b> | Control, n = 10 mice<br>BY-S, n = 14 mice<br>BY-R, n = 5 mice | <i>Two-way RM ANOVA</i> | <i>Tukey's</i> | Group × time interaction     | $3.0 \times 10^{-7}$ | **** | F (6, 78) = 8.703 |
|                              |                                                               |                         |                | Control vs. BY-S at BL       | 0.9744               | ns   |                   |
|                              |                                                               |                         |                | Control vs. BY-R at BL       | 0.9993               | ns   |                   |
|                              |                                                               |                         |                | BY-S vs. BY-R at BL          | 0.9802               | ns   |                   |
|                              |                                                               |                         |                | Control vs. BY-S at Test 1   | $9.3 \times 10^{-6}$ | **** |                   |
|                              |                                                               |                         |                | Control vs. BY-R at Test 1   | 0.3638               | ns   |                   |
|                              |                                                               |                         |                | BY-S vs. BY-R at Test 1      | 0.0138               | *    |                   |
|                              |                                                               |                         |                | Control vs. BY-S at Test 2   | $7.0 \times 10^{-5}$ | **** |                   |
|                              |                                                               |                         |                | Control vs. BY-R at Test 2   | 0.4906               | ns   |                   |
|                              |                                                               |                         |                | BY-S vs. BY-R at Test 2      | 0.0254               | *    |                   |
|                              |                                                               |                         |                | Control vs. BY-S at Test 3   | $2.9 \times 10^{-6}$ | **** |                   |
|                              |                                                               |                         |                | Control vs. BY-R at Test 3   | 0.9964               | ns   |                   |
|                              |                                                               |                         |                | BY-S vs. BY-R at Test 3      | 0.0037               | **   |                   |
|                              |                                                               |                         |                | Control BL vs. Test 1        | 0.9878               | ns   |                   |
|                              |                                                               |                         |                | Control BL vs. Test 2        | 0.9823               | ns   |                   |
|                              |                                                               |                         |                | Control BL vs. Test 3        | 0.9998               | ns   |                   |
|                              |                                                               |                         |                | Control Test 1 vs. Test 2    | 0.8841               | ns   |                   |
|                              |                                                               |                         |                | Control Test 1 vs. Test 3    | 0.8811               | ns   |                   |
|                              |                                                               |                         |                | Control Test 2 vs. Test 3    | 0.9880               | ns   |                   |
|                              |                                                               |                         |                | BY-S BL vs. Test 1           | $4.4 \times 10^{-6}$ | **** |                   |



|                              |                                                                                                              |                         |                |                                      |                        |      |                    |
|------------------------------|--------------------------------------------------------------------------------------------------------------|-------------------------|----------------|--------------------------------------|------------------------|------|--------------------|
|                              |                                                                                                              |                         |                | BY-S BL vs. Test 2                   | 3.2 x 10 <sup>-5</sup> | **** |                    |
|                              |                                                                                                              |                         |                | BY-S BL vs. Test 3                   | 3.0 x 10 <sup>-6</sup> | **** |                    |
|                              |                                                                                                              |                         |                | BY-S Test 1 vs. Test 2               | 0.5457                 | ns   |                    |
|                              |                                                                                                              |                         |                | BY-S Test 1 vs. Test 3               | 0.9847                 | ns   |                    |
|                              |                                                                                                              |                         |                | BY-S Test 2 vs. Test 3               | 0.4342                 | ns   |                    |
|                              |                                                                                                              |                         |                | BY-R BL vs. Test 1                   | 0.6463                 | ns   |                    |
|                              |                                                                                                              |                         |                | BY-R BL vs. Test 2                   | 0.6390                 | ns   |                    |
|                              |                                                                                                              |                         |                | BY-R BL vs. Test 3                   | 0.9998                 | ns   |                    |
|                              |                                                                                                              |                         |                | BY-R Test 1 vs. Test 2               | 0.9558                 | ns   |                    |
|                              |                                                                                                              |                         |                | BY-R Test 11 vs. Test 3              | 0.7438                 | ns   |                    |
|                              |                                                                                                              |                         |                | BY-R Test 2 vs. Test 3               | 0.4689                 | ns   |                    |
| <b>Supplementary Fig. 7b</b> | Test 1, n = 21 mice<br>Test 2, n = 21 mice<br>Test 3, n = 21 mice                                            | <i>chi-square test</i>  |                |                                      | 0.9226                 | ns   | $\chi^2 = 0.1611$  |
|                              | Test 1, BY-S n = 15 mice<br>Test 1, BY-R n = 6 mice                                                          |                         |                |                                      |                        |      |                    |
|                              | Test 2, BY-S n = 16 mice<br>Test 2, BY-R n = 5 mice                                                          |                         |                |                                      |                        |      |                    |
|                              | Test 3, BY-S n = 15 mice<br>Test 3, BY-R n = 6 mice                                                          |                         |                |                                      |                        |      |                    |
| <b>Supplementary Fig. 7c</b> | Control+saline, n = 11 mice<br>Control+CNO, n = 10 mice<br>BY-S+saline, n = 14 mice<br>BY-S+CNO, n = 13 mice | <i>Two-way RM ANOVA</i> | <i>Tukey's</i> | Group × time interaction             | 5.5 x 10 <sup>-8</sup> | **** | F (9, 132) = 6.797 |
|                              |                                                                                                              |                         |                | Control+saline vs. Control+CNO at BL | 0.9998                 | ns   |                    |
|                              |                                                                                                              |                         |                | Control+saline vs. BY-S+saline at BL | 0.7319                 | ns   |                    |
|                              |                                                                                                              |                         |                | Control+saline vs. BY-S+CNO at BL    | 0.9067                 | ns   |                    |
|                              |                                                                                                              |                         |                | Control+CNO vs. BY-S+saline at BL    | 0.8156                 | ns   |                    |

|                              |                                                 |                                  |                |                                         |                      |      |                   |
|------------------------------|-------------------------------------------------|----------------------------------|----------------|-----------------------------------------|----------------------|------|-------------------|
|                              |                                                 |                                  |                | Control+CNO vs. BY-S+CNO at BL          | 0.9457               | ns   |                   |
|                              |                                                 |                                  |                | BY-S+saline vs. BY-S+CNO at BL          | 0.9871               | ns   |                   |
|                              |                                                 |                                  |                | Control+saline vs. Control+CNO at 30min | 0.1333               | ns   |                   |
|                              |                                                 |                                  |                | Control+saline vs. BY-S+saline at 30min | $6.1 \times 10^{-6}$ | **** |                   |
|                              |                                                 |                                  |                | Control+saline vs. BY-S+CNO at 30min    | 0.2484               | ns   |                   |
|                              |                                                 |                                  |                | Control+CNO vs. BY-S+saline at 30min    | <0.0001              | ***  |                   |
|                              |                                                 |                                  |                | Control+CNO vs. BY-S+CNO at 30min       | 0.0104               | *    |                   |
|                              |                                                 |                                  |                | BY-S+saline vs. BY-S+CNO at 30min       | 0.0019               | **   |                   |
|                              |                                                 |                                  |                | Control+saline vs. Control+CNO at 2h    | 0.6355               | ns   |                   |
|                              |                                                 |                                  |                | Control+saline vs. BY-S+saline at 2h    | $1.2 \times 10^{-6}$ | **** |                   |
|                              |                                                 |                                  |                | Control+saline vs. BY-S+CNO at 2h       | 0.0074               | **   |                   |
|                              |                                                 |                                  |                | Control+CNO vs. BY-S+saline at 2h       | 0.0003               | ***  |                   |
|                              |                                                 |                                  |                | Control+CNO vs. BY-S+CNO at 2h          | 0.0121               | *    |                   |
|                              |                                                 |                                  |                | BY-S+saline vs. BY-S+CNO at 2h          | 0.0047               | **   |                   |
|                              |                                                 |                                  |                | Control+saline vs. Control+CNO at 6h    | 0.6660               | ns   |                   |
|                              |                                                 |                                  |                | Control+saline vs. BY-S+saline at 6h    | $1.2 \times 10^{-5}$ | **** |                   |
|                              |                                                 |                                  |                | Control+saline vs. BY-S+CNO at 6h       | $3.3 \times 10^{-5}$ | **** |                   |
|                              |                                                 |                                  |                | Control+CNO vs. BY-S+saline at 6h       | 0.0007               | ***  |                   |
|                              |                                                 |                                  |                | Control+CNO vs. BY-S+CNO at 6h          | 0.0014               | **   |                   |
|                              |                                                 |                                  |                | BY-S+saline vs. BY-S+CNO at 6h          | 0.1871               | ns   |                   |
| <b>Supplementary Fig. 7d</b> | n = 9 mice                                      | <i>Two-sided Friedman test</i>   | <i>Dunn's</i>  | Summary                                 | $5.5 \times 10^{-5}$ | **** | Q = 14.80         |
|                              |                                                 |                                  |                | BL vs. Pre                              | 0.0201               | *    |                   |
|                              |                                                 |                                  |                | BL vs. CNO                              | >0.9999              | ns   |                   |
|                              |                                                 |                                  |                | Pre vs. CNO                             | 0.0008               | ***  |                   |
| <b>Supplementary Fig. 7f</b> | Gq-saline, n = 8 slices<br>Gq-CNO, n = 9 slices | <i>Unpaired Two-sided t-test</i> |                |                                         | <0.0001              | **** | t (15) = 39.30    |
| <b>Supplementary</b>         | Control, n = 10 mice                            | <i>Two-way RM ANOVA</i>          | <i>Tukey's</i> | Group × time interaction                | $1,7 \times 10^{-6}$ | **** | F (6, 78) = 7.693 |

| Fig. 8a | BY-S, n = 13 mice<br>BY-R, n = 6 mice |  |  |                            |                        |      |
|---------|---------------------------------------|--|--|----------------------------|------------------------|------|
|         |                                       |  |  | Control vs. BY-S at BL     | 0.9679                 | ns   |
|         |                                       |  |  | Control vs. BY-R at BL     | 0.9795                 | ns   |
|         |                                       |  |  | BY-S vs. BY-R at BL        | 0.9963                 | ns   |
|         |                                       |  |  | Control vs. BY-S at Test 1 | 4.5 x 10 <sup>-7</sup> | **** |
|         |                                       |  |  | Control vs. BY-R at Test 1 | 0.9780                 | ns   |
|         |                                       |  |  | BY-S vs. BY-R at Test 1    | 0.0002                 | ***  |
|         |                                       |  |  | Control vs. BY-S at Test 2 | 4.1 x 10 <sup>-5</sup> | **** |
|         |                                       |  |  | Control vs. BY-R at Test 2 | 0.9786                 | ns   |
|         |                                       |  |  | BY-S vs. BY-R at Test 2    | 0.0047                 | **   |
|         |                                       |  |  | Control vs. BY-S at Test 3 | 0.0006                 | ***  |
|         |                                       |  |  | Control vs. BY-R at Test 3 | 0.9899                 | ns   |
|         |                                       |  |  | BY-S vs. BY-R at Test 3    | 0.0078                 | **   |
|         |                                       |  |  | Control BL vs. Test 1      | 0.9999                 | ns   |
|         |                                       |  |  | Control BL vs. Test 2      | 0.9997                 | ns   |
|         |                                       |  |  | Control BL vs. Test 3      | >0.9999                | ns   |
|         |                                       |  |  | Control Test 1 vs. Test 2  | 0.9965                 | ns   |
|         |                                       |  |  | Control Test 1 vs. Test 3  | >0.9999                | ns   |
|         |                                       |  |  | Control Test 2 vs. Test 3  | 0.9996                 | ns   |
|         |                                       |  |  | BY-S BL vs. Test 1         | 8.7 x 10 <sup>-6</sup> | **** |
|         |                                       |  |  | BY-S BL vs. Test 2         | 1.1 x 10 <sup>-5</sup> | **** |
|         |                                       |  |  | BY-S BL vs. Test 3         | 2.4 x 10 <sup>-6</sup> | **** |
|         |                                       |  |  | BY-S Test 1 vs. Test 2     | 0.9993                 | ns   |
|         |                                       |  |  | BY-S Test 1 vs. Test 3     | 0.9979                 | ns   |
|         |                                       |  |  | BY-S Test 2 vs. Test 3     | 0.9927                 | ns   |
|         |                                       |  |  | BY-R BL vs. Test 1         | 0.9996                 | ns   |
|         |                                       |  |  | BY-R BL vs. Test 2         | 0.9666                 | ns   |

|                              |                                                                                                            |                         |                |                                         |         |    |                    |
|------------------------------|------------------------------------------------------------------------------------------------------------|-------------------------|----------------|-----------------------------------------|---------|----|--------------------|
|                              |                                                                                                            |                         |                | BY-R BL vs. Test 3                      | >0.9999 | ns |                    |
|                              |                                                                                                            |                         |                | BY-R Test 1 vs. Test 2                  | 0.9370  | ns |                    |
|                              |                                                                                                            |                         |                | BY-R Test 1I vs. Test 3                 | >0.9999 | ns |                    |
|                              |                                                                                                            |                         |                | BY-R Test 2 vs. Test 3                  | 0.9736  | ns |                    |
| <b>Supplementary Fig. 8b</b> | Test 1, n = 19 mice<br>Test 2, n = 19 mice<br>Test 3, n = 19 mice                                          | <i>chi-square test</i>  |                |                                         | 0.9168  | ns | $\chi^2 = 0.1738$  |
|                              | Test 1, BY-S n = 13 mice<br>Test 1, BY-R n = 6 mice                                                        |                         |                |                                         |         |    |                    |
|                              | Test 2, BY-S n = 14 mice<br>Test 2, BY-R n = 5 mice                                                        |                         |                |                                         |         |    |                    |
|                              | Test 3, BY-S n = 14 mice<br>Test 3, BY-R n = 5 mice                                                        |                         |                |                                         |         |    |                    |
| <b>Supplementary Fig. 8c</b> | Control+saline, n = 10 mice<br>Control+CNO, n = 10 mice<br>BY-R+saline, n = 5 mice<br>BY-R+CNO, n = 5 mice | <i>Two-way RM ANOVA</i> | <i>Tukey's</i> | Group × time interaction                | 0.9179  | ns | F (9, 78) = 0.4251 |
|                              |                                                                                                            |                         |                | Control+saline vs. Control+CNO at BL    | 0.6870  | ns |                    |
|                              |                                                                                                            |                         |                | Control+saline vs. BY-R+saline at BL    | 0.9971  | ns |                    |
|                              |                                                                                                            |                         |                | Control+saline vs. BY-R+CNO at BL       | 0.9971  | ns |                    |
|                              |                                                                                                            |                         |                | Control+CNO vs. BY-R+saline at BL       | 0.6311  | ns |                    |
|                              |                                                                                                            |                         |                | Control+CNO vs. BY-R+CNO at BL          | 0.6311  | ns |                    |
|                              |                                                                                                            |                         |                | BY-R+saline vs. BY-R+CNO at BL          | >0.9999 | ns |                    |
|                              |                                                                                                            |                         |                | Control+saline vs. Control+CNO at 30min | 0.9749  | ns |                    |
|                              |                                                                                                            |                         |                | Control+saline vs. BY-R+saline at 30min | 0.9883  | ns |                    |
|                              |                                                                                                            |                         |                | Control+saline vs. BY-R+CNO at 30min    | 0.8790  | ns |                    |
|                              |                                                                                                            |                         |                | Control+CNO vs. BY-R+saline at 30min    | 0.9052  | ns |                    |
|                              |                                                                                                            |                         |                | Control+CNO vs. BY-R+CNO at 30min       | 0.9642  | ns |                    |

|                              |                                                                                                              |                                  |                |                                      |                       |      |                     |
|------------------------------|--------------------------------------------------------------------------------------------------------------|----------------------------------|----------------|--------------------------------------|-----------------------|------|---------------------|
|                              |                                                                                                              |                                  |                | BY-R+saline vs. BY-R+CNO at 30min    | 0.8007                | ns   |                     |
|                              |                                                                                                              |                                  |                | Control+saline vs. Control+CNO at 2h | 0.8704                | ns   |                     |
|                              |                                                                                                              |                                  |                | Control+saline vs. BY-R+saline at 2h | 0.9473                | ns   |                     |
|                              |                                                                                                              |                                  |                | Control+saline vs. BY-R+CNO at 2h    | 0.2651                | ns   |                     |
|                              |                                                                                                              |                                  |                | Control+CNO vs. BY-R+saline at 2h    | >0.9999               | ns   |                     |
|                              |                                                                                                              |                                  |                | Control+CNO vs. BY-R+CNO at 2h       | 0.9469                | ns   |                     |
|                              |                                                                                                              |                                  |                | BY-R+saline vs. BY-R+CNO at 2h       | 0.9800                | ns   |                     |
|                              |                                                                                                              |                                  |                | Control+saline vs. Control+CNO at 6h | >0.9999               | ns   |                     |
|                              |                                                                                                              |                                  |                | Control+saline vs. BY-R+saline at 6h | 0.4300                | ns   |                     |
|                              |                                                                                                              |                                  |                | Control+saline vs. BY-R+CNO at 6h    | 0.9950                | ns   |                     |
|                              |                                                                                                              |                                  |                | Control+CNO vs. BY-R+saline at 6h    | 0.5519                | ns   |                     |
|                              |                                                                                                              |                                  |                | Control+CNO vs. BY-R+CNO at 6h       | 0.9957                | ns   |                     |
|                              |                                                                                                              |                                  |                | BY-R+saline vs. BY-R+CNO at 6h       | 0.8603                | ns   |                     |
| <b>Supplementary Fig. 8d</b> | Control, n = 10 mice<br>BY+saline, n = 8 mice<br>BY+CNO, n = 9 mice                                          | <i>Two-way RM ANOVA</i>          | <i>Tukey's</i> | Group × time interaction             | 0.2649                | ns   | F (2, 24) = 1.405   |
|                              |                                                                                                              |                                  |                | Control vs. BY+saline at BL          | 0.8308                | ns   |                     |
|                              |                                                                                                              |                                  |                | Control vs. BY+CNO at BL             | 0.9761                | ns   |                     |
|                              |                                                                                                              |                                  |                | BY+saline vs. BY+CNO at BL           | 0.9710                | ns   |                     |
|                              |                                                                                                              |                                  |                | Control vs. BY+saline at BY-15min    | 0.8515                | ns   |                     |
|                              |                                                                                                              |                                  |                | Control vs. BY+CNO at BY-15min       | 0.2933                | ns   |                     |
|                              |                                                                                                              |                                  |                | BY+saline vs. BY+CNO at BY-15min     | 0.0841                | ns   |                     |
| <b>Supplementary Fig. 8f</b> | Gi-saline, n = 8 slices<br>Gi-CNO, n = 7 slices                                                              | <i>Unpaired Two-sided t-test</i> |                |                                      | $2.0 \times 10^{-5}$  | **** | t (13) = 6.517      |
| <b>Fig. 6b</b>               | Control+mCherry, n = 20 mice<br>Control+Gq, n = 10 mice<br>Control+Gi, n = 7 mice<br>BY+mCherry, n = 20 mice | <i>Two-way RM ANOVA</i>          | <i>Tukey's</i> | Group × time interaction             | $5.6 \times 10^{-13}$ | **** | F (15, 261) = 7.088 |

|  | BY+Gq, n = 20 mice<br>BY+Gi, n = 16 mice |  |  |                                         |                       |      |
|--|------------------------------------------|--|--|-----------------------------------------|-----------------------|------|
|  |                                          |  |  | Control+mCherry vs. Control+Gq at BL    | 0.3401                | ns   |
|  |                                          |  |  | Control+mCherry vs. Control+Gi at BL    | >0.9999               | ns   |
|  |                                          |  |  | Control+mCherry vs. BY+mCherry at BL    | 0.8616                | ns   |
|  |                                          |  |  | Control+mCherry vs. BY+Gq at BL         | 0.5857                | ns   |
|  |                                          |  |  | Control+mCherry vs. BY+Gi at BL         | 0.9988                | ns   |
|  |                                          |  |  | Control+Gq vs. Control+Gi at BL         | 0.7242                | ns   |
|  |                                          |  |  | Control+Gq vs. BY+mCherry at BL         | 0.9172                | ns   |
|  |                                          |  |  | Control+Gq vs. BY+Gq at BL              | 0.9666                | ns   |
|  |                                          |  |  | Control+Gq vs. BY+Gi at BL              | 0.2466                | ns   |
|  |                                          |  |  | Control+Gi vs. BY+mCherry at BL         | 0.9772                | ns   |
|  |                                          |  |  | Control+Gi vs. BY+Gq at BL              | 0.9265                | ns   |
|  |                                          |  |  | Control+Gi vs. BY+Gi at BL              | >0.9999               | ns   |
|  |                                          |  |  | BY+mCherry vs. BY+Gq at BL              | 0.9996                | ns   |
|  |                                          |  |  | BY+mCherry vs. BY+Gi at BL              | 0.7220                | ns   |
|  |                                          |  |  | BY+Gq vs. BY+Gi at BL                   | 0.4210                | ns   |
|  |                                          |  |  | Control+mCherry vs. Control+Gq at 30min | 0.9999                | ns   |
|  |                                          |  |  | Control+mCherry vs. Control+Gi at 30min | >0.9999               | ns   |
|  |                                          |  |  | Control+mCherry vs. BY+mCherry at 30min | $4.3 \times 10^{-5}$  | **** |
|  |                                          |  |  | Control+mCherry vs. BY+Gq at 30min      | 0.9266                | ns   |
|  |                                          |  |  | Control+mCherry vs. BY+Gi at 30min      | $2.1 \times 10^{-10}$ | **** |
|  |                                          |  |  | Control+Gq vs. Control+Gi at 30min      | >0.9999               | ns   |
|  |                                          |  |  | Control+Gq vs. BY+mCherry at 30min      | 0.0012                | **   |
|  |                                          |  |  | Control+Gq vs. BY+Gq at 30min           | 0.9867                | ns   |
|  |                                          |  |  | Control+Gq vs. BY+Gi at 30min           | 0.0001                | ***  |
|  |                                          |  |  | Control+Gi vs. BY+mCherry at 30min      | 0.0012                | **   |
|  |                                          |  |  | Control+Gi vs. BY+Gq at 30min           | 0.9659                | ns   |

|  |  |  |                                      |                       |      |
|--|--|--|--------------------------------------|-----------------------|------|
|  |  |  | Control+Gi vs. BY+Gi at 30min        | 0.0004                | ***  |
|  |  |  | BY+mCherry vs. BY+Gq at 30min        | 0.0044                | **   |
|  |  |  | BY+mCherry vs. BY+Gi at 30min        | 0.4665                | ns   |
|  |  |  | BY+Gq vs. BY+Gi at 30min             | $6.8 \times 10^{-6}$  | **** |
|  |  |  | Control+mCherry vs. Control+Gq at 2h | >0.9999               | ns   |
|  |  |  | Control+mCherry vs. Control+Gi at 2h | 0.9790                | ns   |
|  |  |  | Control+mCherry vs. BY+mCherry at 2h | 0.0015                | **   |
|  |  |  | Control+mCherry vs. BY+Gq at 2h      | >0.9999               | ns   |
|  |  |  | Control+mCherry vs. BY+Gi at 2h      | $3.0 \times 10^{-12}$ | **** |
|  |  |  | Control+Gq vs. Control+Gi at 2h      | 0.9997                | ns   |
|  |  |  | Control+Gq vs. BY+mCherry at 2h      | 0.1105                | ns   |
|  |  |  | Control+Gq vs. BY+Gq at 2h           | >0.9999               | ns   |
|  |  |  | Control+Gq vs. BY+Gi at 2h           | 0.0064                | **   |
|  |  |  | Control+Gi vs. BY+mCherry at 2h      | 0.0184                | *    |
|  |  |  | Control+Gi vs. BY+Gq at 2h           | 0.9846                | ns   |
|  |  |  | Control+Gi vs. BY+Gi at 2h           | 0.0003                | ***  |
|  |  |  | BY+mCherry vs. BY+Gq at 2h           | 0.0110                | *    |
|  |  |  | BY+mCherry vs. BY+Gi at 2h           | 0.2358                | ns   |
|  |  |  | BY+Gq vs. BY+Gi at 2h                | $9.9 \times 10^{-6}$  | **** |
|  |  |  | Control+mCherry vs. Control+Gq at 6h | 0.9926                | ns   |
|  |  |  | Control+mCherry vs. Control+Gi at 6h | 0.9941                | ns   |
|  |  |  | Control+mCherry vs. BY+mCherry at 6h | 0.0002                | ***  |
|  |  |  | Control+mCherry vs. BY+Gq at 6h      | >0.9999               | ns   |
|  |  |  | Control+mCherry vs. BY+Gi at 6h      | $2.0 \times 10^{-12}$ | **** |
|  |  |  | Control+Gq vs. Control+Gi at 6h      | >0.9999               | ns   |
|  |  |  | Control+Gq vs. BY+mCherry at 6h      | 0.0412                | *    |
|  |  |  | Control+Gq vs. BY+Gq at 6h           | 0.9922                | ns   |
|  |  |  | Control+Gq vs. BY+Gi at 6h           | 0.0041                | **   |

|                |                                                           |                                          |  |                                 |                      |      |                  |
|----------------|-----------------------------------------------------------|------------------------------------------|--|---------------------------------|----------------------|------|------------------|
|                |                                                           |                                          |  | Control+Gi vs. BY+mCherry at 6h | 0.0153               | *    |                  |
|                |                                                           |                                          |  | Control+Gi vs. BY+Gq at 6h      | 0.9947               | ns   |                  |
|                |                                                           |                                          |  | Control+Gi vs. BY+Gi at 6h      | 0.0027               | **   |                  |
|                |                                                           |                                          |  | BY+mCherry vs. BY+Gq at 6h      | 0.0115               | *    |                  |
|                |                                                           |                                          |  | BY+mCherry vs. BY+Gi at 6h      | 0.1384               | ns   |                  |
|                |                                                           |                                          |  | BY+Gq vs. BY+Gi at 6h           | $2.2 \times 10^{-5}$ | **** |                  |
| <b>Fig. 6c</b> | Saline, n = 20 mice<br>Gq, n = 20 mice<br>Gi, n = 20 mice | <i>chi-square test</i>                   |  |                                 | $3.5 \times 10^{-5}$ | **** | $\chi^2 = 20.48$ |
|                | Saline, BY-S n = 15 mice<br>Saline, BY-R n = 5 mice       |                                          |  |                                 |                      |      |                  |
|                | Gq, BY-S n = 7 mice<br>Gq, BY-R n = 13 mice               |                                          |  |                                 |                      |      |                  |
|                | Gi, BY-S n = 20 mice<br>Gi, BY-R n = 0 mice               |                                          |  |                                 |                      |      |                  |
| <b>Fig. 6c</b> | Saline, n = 20 mice<br>Gq, n = 20 mice                    | <i>Two-sided<br/>Fisher's exact test</i> |  |                                 | 0.0248               | *    |                  |
|                | Saline, BY-S n = 15 mice<br>Saline, BY-R n = 5 mice       |                                          |  |                                 |                      |      |                  |
|                | Gq, BY-S n = 7 mice<br>Gq, BY-R n = 13 mice               |                                          |  |                                 |                      |      |                  |
| <b>Fig. 6c</b> | Saline, n = 20 mice<br>Gi, n = 20 mice                    | <i>Two-sided<br/>Fisher's exact test</i> |  |                                 | 0.0471               | *    |                  |
|                | Saline, BY-S n = 15 mice<br>Saline, BY-R n = 5 mice       |                                          |  |                                 |                      |      |                  |
|                | Gi, BY-S n = 20 mice<br>Gi, BY-R n = 0 mice               |                                          |  |                                 |                      |      |                  |
| <b>Fig. 6c</b> | Gq, n = 20 mice                                           | <i>Two-sided</i>                         |  |                                 | $1.3 \times 10^{-5}$ | **** |                  |



|                |                                                                                                                                                        |                            |                |                                         |                        |      |                     |
|----------------|--------------------------------------------------------------------------------------------------------------------------------------------------------|----------------------------|----------------|-----------------------------------------|------------------------|------|---------------------|
|                | Gi, n = 20 mice                                                                                                                                        | <i>Fisher's exact test</i> |                |                                         |                        |      |                     |
|                | Gq, BY-S n = 7 mice<br>Gq, BY-R n = 13 mice                                                                                                            |                            |                |                                         |                        |      |                     |
|                | Gi, BY-S n = 20 mice<br>Gi, BY-R n = 0 mice                                                                                                            |                            |                |                                         |                        |      |                     |
| <b>Fig. 6d</b> | Control+mCherry, n = 10 mice<br>Control+Gq, n = 9 mice<br>Control+Gi, n = 9 mice<br>BY+mCherry, n = 20 mice<br>BY+Gq, n = 9 mice<br>BY+Gi, n = 10 mice | <i>Two-way RM ANOVA</i>    | <i>Tukey's</i> | Group × time interaction                | 3.6 x 10 <sup>-6</sup> | **** | F (15, 183) = 3.955 |
|                |                                                                                                                                                        |                            |                | Control+mCherry vs. Control+Gq at BL    | 0.9987                 | ns   |                     |
|                |                                                                                                                                                        |                            |                | Control+mCherry vs. Control+Gi at BL    | 0.9702                 | ns   |                     |
|                |                                                                                                                                                        |                            |                | Control+mCherry vs. BY+mCherry at BL    | 0.9976                 | ns   |                     |
|                |                                                                                                                                                        |                            |                | Control+mCherry vs. BY+Gq at BL         | 0.9987                 | ns   |                     |
|                |                                                                                                                                                        |                            |                | Control+mCherry vs. BY+Gi at BL         | 0.9768                 | ns   |                     |
|                |                                                                                                                                                        |                            |                | Control+Gq vs. Control+Gi at BL         | 0.9986                 | ns   |                     |
|                |                                                                                                                                                        |                            |                | Control+Gq vs. BY+mCherry at BL         | 0.9288                 | ns   |                     |
|                |                                                                                                                                                        |                            |                | Control+Gq vs. BY+Gq at BL              | >0.9999                | ns   |                     |
|                |                                                                                                                                                        |                            |                | Control+Gq vs. BY+Gi at BL              | 0.9994                 | ns   |                     |
|                |                                                                                                                                                        |                            |                | Control+Gi vs. BY+mCherry at BL         | 0.7159                 | ns   |                     |
|                |                                                                                                                                                        |                            |                | Control+Gi vs. BY+Gq at BL              | 0.9986                 | ns   |                     |
|                |                                                                                                                                                        |                            |                | Control+Gi vs. BY+Gi at BL              | >0.9999                | ns   |                     |
|                |                                                                                                                                                        |                            |                | BY+mCherry vs. BY+Gq at BL              | 0.9288                 | ns   |                     |
|                |                                                                                                                                                        |                            |                | BY+mCherry vs. BY+Gi at BL              | 0.7107                 | ns   |                     |
|                |                                                                                                                                                        |                            |                | BY+Gq vs. BY+Gi at BL                   | 0.9994                 | ns   |                     |
|                |                                                                                                                                                        |                            |                | Control+mCherry vs. Control+Gq at 30min | 0.9976                 | ns   |                     |
|                |                                                                                                                                                        |                            |                | Control+mCherry vs. Control+Gi at 30min | 0.9873                 | ns   |                     |

|  |  |  |                                         |         |    |
|--|--|--|-----------------------------------------|---------|----|
|  |  |  | Control+mCherry vs. BY+mCherry at 30min | 0.0196  | *  |
|  |  |  | Control+mCherry vs. BY+Gq at 30min      | 0.5598  | ns |
|  |  |  | Control+mCherry vs. BY+Gi at 30min      | 0.0446  | *  |
|  |  |  | Control+Gq vs. Control+Gi at 30min      | >0.9999 | ns |
|  |  |  | Control+Gq vs. BY+mCherry at 30min      | 0.0099  | ** |
|  |  |  | Control+Gq vs. BY+Gq at 30min           | 0.4220  | ns |
|  |  |  | Control+Gq vs. BY+Gi at 30min           | 0.0248  | *  |
|  |  |  | Control+Gi vs. BY+mCherry at 30min      | 0.0056  | ** |
|  |  |  | Control+Gi vs. BY+Gq at 30min           | 0.3621  | ns |
|  |  |  | Control+Gi vs. BY+Gi at 30min           | 0.0170  | *  |
|  |  |  | BY+mCherry vs. BY+Gq at 30min           | 0.9895  | ns |
|  |  |  | BY+mCherry vs. BY+Gi at 30min           | >0.9999 | ns |
|  |  |  | BY+Gq vs. BY+Gi at 30min                | 0.9855  | ns |
|  |  |  | Control+mCherry vs. Control+Gq at 2h    | 0.9785  | ns |
|  |  |  | Control+mCherry vs. Control+Gi at 2h    | 0.9783  | ns |
|  |  |  | Control+mCherry vs. BY+mCherry at 2h    | 0.0069  | ** |
|  |  |  | Control+mCherry vs. BY+Gq at 2h         | 0.2245  | ns |
|  |  |  | Control+mCherry vs. BY+Gi at 2h         | 0.0099  | ** |
|  |  |  | Control+Gq vs. Control+Gi at 2h         | >0.9999 | ns |
|  |  |  | Control+Gq vs. BY+mCherry at 2h         | 0.0520  | ns |
|  |  |  | Control+Gq vs. BY+Gq at 2h              | 0.4719  | ns |
|  |  |  | Control+Gq vs. BY+Gi at 2h              | 0.0479  | *  |
|  |  |  | Control+Gi vs. BY+mCherry at 2h         | 0.0207  | *  |
|  |  |  | Control+Gi vs. BY+Gq at 2h              | 0.4038  | ns |
|  |  |  | Control+Gi vs. BY+Gi at 2h              | 0.0266  | *  |
|  |  |  | BY+mCherry vs. BY+Gq at 2h              | 0.9976  | ns |
|  |  |  | BY+mCherry vs. BY+Gi at 2h              | 0.9991  | ns |
|  |  |  | BY+Gq vs. BY+Gi at 2h                   | 0.9805  | ns |

|                |                                                           |                                          |  |                                      |         |    |  |
|----------------|-----------------------------------------------------------|------------------------------------------|--|--------------------------------------|---------|----|--|
|                |                                                           |                                          |  | Control+mCherry vs. Control+Gq at 6h | 0.9989  | ns |  |
|                |                                                           |                                          |  | Control+mCherry vs. Control+Gi at 6h | 0.9996  | ns |  |
|                |                                                           |                                          |  | Control+mCherry vs. BY+mCherry at 6h | 0.0831  | ns |  |
|                |                                                           |                                          |  | Control+mCherry vs. BY+Gq at 6h      | 0.3524  | ns |  |
|                |                                                           |                                          |  | Control+mCherry vs. BY+Gi at 6h      | 0.0624  | ns |  |
|                |                                                           |                                          |  | Control+Gq vs. Control+Gi at 6h      | 0.9746  | ns |  |
|                |                                                           |                                          |  | Control+Gq vs. BY+mCherry at 6h      | 0.0407  | *  |  |
|                |                                                           |                                          |  | Control+Gq vs. BY+Gq at 6h           | 0.2173  | ns |  |
|                |                                                           |                                          |  | Control+Gq vs. BY+Gi at 6h           | 0.0315  | *  |  |
|                |                                                           |                                          |  | Control+Gi vs. BY+mCherry at 6h      | 0.0479  | *  |  |
|                |                                                           |                                          |  | Control+Gi vs. BY+Gq at 6h           | 0.3767  | ns |  |
|                |                                                           |                                          |  | Control+Gi vs. BY+Gi at 6h           | 0.0416  | *  |  |
|                |                                                           |                                          |  | BY+mCherry vs. BY+Gq at 6h           | 0.9997  | ns |  |
|                |                                                           |                                          |  | BY+mCherry vs. BY+Gi at 6h           | 0.9994  | ns |  |
|                |                                                           |                                          |  | BY+Gq vs. BY+Gi at 6h                | 0.9944  | ns |  |
| <b>Fig. 6e</b> | Saline, n = 20 mice<br>Gq, n = 10 mice<br>Gi, n = 10 mice | <i>chi-square test</i>                   |  |                                      | >0.9999 | ns |  |
|                | Saline, BY-S n = 14 mice<br>Saline, BY-R n = 6 mice       |                                          |  |                                      |         |    |  |
|                | Gq, BY-S n = 7 mice<br>Gq, BY-R n = 3 mice                |                                          |  |                                      |         |    |  |
|                | Gi, BY-S n = 7 mice<br>Gi, BY-R n = 3 mice                |                                          |  |                                      |         |    |  |
| <b>Fig. 6e</b> | Saline, n = 20 mice<br>Gq, n = 10 mice                    | <i>Two-sided<br/>Fisher's exact test</i> |  |                                      | >0.9999 | ns |  |
|                | Saline, BY-S n = 14 mice<br>Saline, BY-R n = 6 mice       |                                          |  |                                      |         |    |  |

|                |                                                                                                              |                                                |                |                                           |                         |      |                    |
|----------------|--------------------------------------------------------------------------------------------------------------|------------------------------------------------|----------------|-------------------------------------------|-------------------------|------|--------------------|
|                | Gq, BY-S n = 7 mice<br>Gq, BY-R n = 3 mice                                                                   |                                                |                |                                           |                         |      |                    |
| <b>Fig. 6e</b> | Saline, n = 20 mice<br>Gi, n = 10 mice                                                                       | <i>Two-sided</i><br><i>Fisher's exact test</i> |                |                                           | >0.9999                 | ns   |                    |
|                | Saline, BY-S n = 14 mice<br>Saline, BY-R n = 6 mice<br>Gi, BY-S n = 7 mice<br>Gi, BY-R n = 3 mice            |                                                |                |                                           |                         |      |                    |
| <b>Fig. 6g</b> | Control+mCherry, n = 20 mice<br>Control+Gq, n = 10 mice<br>BY-S+mCherry, n = 16 mice<br>BY-S+Gq, n = 15 mice | <i>Two-way RM ANOVA</i>                        | <i>Tukey's</i> | Group × time interaction                  | 2.0 x 10 <sup>-15</sup> | **** | F (9, 171) = 12.70 |
|                |                                                                                                              |                                                |                | Control+mCherry vs. Control+Gq at BL      | 0.1994                  | ns   |                    |
|                |                                                                                                              |                                                |                | Control+mCherry vs. BY-S+mCherry at BL    | 0.5793                  | ns   |                    |
|                |                                                                                                              |                                                |                | Control+mCherry vs. BY-S+Gq at BL         | 0.6260                  | ns   |                    |
|                |                                                                                                              |                                                |                | Control+Gq vs. BY-S+mCherry at BL         | 0.8567                  | ns   |                    |
|                |                                                                                                              |                                                |                | Control+Gq vs. BY-S+Gq at BL              | 0.7415                  | ns   |                    |
|                |                                                                                                              |                                                |                | BY-S+mCherry vs. BY-S+Gq at BL            | 0.9977                  | ns   |                    |
|                |                                                                                                              |                                                |                | Control+mCherry vs. Control+Gq at 30min   | 0.9955                  | ns   |                    |
|                |                                                                                                              |                                                |                | Control+mCherry vs. BY-S+mCherry at 30min | 7.9 x 10 <sup>-11</sup> | **** |                    |
|                |                                                                                                              |                                                |                | Control+mCherry vs. BY-S+Gq at 30min      | 0.7642                  | ns   |                    |
|                |                                                                                                              |                                                |                | Control+Gq vs. BY-S+mCherry at 30min      | 4.1 x 10 <sup>-5</sup>  | **** |                    |
|                |                                                                                                              |                                                |                | Control+Gq vs. BY-S+Gq at 30min           | 0.8787                  | ns   |                    |
|                |                                                                                                              |                                                |                | BY-S+mCherry vs. BY-S+Gq at 30min         | 0.0013                  | **   |                    |
|                |                                                                                                              |                                                |                | Control+mCherry vs. Control+Gq at 2h      | 0.9996                  | ns   |                    |
|                |                                                                                                              |                                                |                | Control+mCherry vs. BY-S+mCherry at 2h    | 5.2 x 10 <sup>-12</sup> | **** |                    |
|                |                                                                                                              |                                                |                | Control+mCherry vs. BY-S+Gq at 2h         | 0.0091                  | **   |                    |
|                |                                                                                                              |                                                |                | Control+Gq vs. BY-S+mCherry at 2h         | 0.0051                  | **   |                    |

|                |                                                                                                           |                         |                |                                           |                       |      |                    |
|----------------|-----------------------------------------------------------------------------------------------------------|-------------------------|----------------|-------------------------------------------|-----------------------|------|--------------------|
|                |                                                                                                           |                         |                | Control+Gq vs. BY-S+Gq at 2h              | 0.1118                | ns   |                    |
|                |                                                                                                           |                         |                | BY-S+mCherry vs. BY-S+Gq at 2h            | 0.2711                | ns   |                    |
|                |                                                                                                           |                         |                | Control+mCherry vs. Control+Gq at 6h      | 0.9453                | ns   |                    |
|                |                                                                                                           |                         |                | Control+mCherry vs. BY-S+mCherry at 6h    | $5.5 \times 10^{-12}$ | **** |                    |
|                |                                                                                                           |                         |                | Control+mCherry vs. BY-S+Gq at 6h         | $5.5 \times 10^{-11}$ | **** |                    |
|                |                                                                                                           |                         |                | Control+Gq vs. BY-S+mCherry at 6h         | 0.0034                | **   |                    |
|                |                                                                                                           |                         |                | Control+Gq vs. BY-S+Gq at 6h              | 0.0036                | **   |                    |
|                |                                                                                                           |                         |                | BY-S+mCherry vs. BY-S+Gq at 6h            | 0.9968                | ns   |                    |
| <b>Fig. 6h</b> | Control+mCherry, n = 20 mice<br>Control+Gi, n = 7 mice<br>BY-R+mCherry, n = 4 mice<br>BY-R+Gi, n = 5 mice | <i>Two-way RM ANOVA</i> | <i>Tukey's</i> | Group × time interaction                  | 0.7099                | ns   | F (9, 96) = 0.6972 |
|                |                                                                                                           |                         |                | Control+mCherry vs. Control+Gi at BL      | >0.9999               | ns   |                    |
|                |                                                                                                           |                         |                | Control+mCherry vs. BY-R+mCherry at BL    | 0.9994                | ns   |                    |
|                |                                                                                                           |                         |                | Control+mCherry vs. BY-R+Gi at BL         | 0.9944                | ns   |                    |
|                |                                                                                                           |                         |                | Control+Gi vs. BY-R+mCherry at BL         | 0.9995                | ns   |                    |
|                |                                                                                                           |                         |                | Control+Gi vs. BY-R+Gi at BL              | 0.9986                | ns   |                    |
|                |                                                                                                           |                         |                | BY-R+mCherry vs. BY-R+Gi at BL            | >0.9999               | ns   |                    |
|                |                                                                                                           |                         |                | Control+mCherry vs. Control+Gi at 30min   | 0.9998                | ns   |                    |
|                |                                                                                                           |                         |                | Control+mCherry vs. BY-R+mCherry at 30min | 0.9429                | ns   |                    |
|                |                                                                                                           |                         |                | Control+mCherry vs. BY-R+Gi at 30min      | 0.4799                | ns   |                    |
|                |                                                                                                           |                         |                | Control+Gi vs. BY-R+mCherry at 30min      | 0.9367                | ns   |                    |
|                |                                                                                                           |                         |                | Control+Gi vs. BY-R+Gi at 30min           | 0.5751                | ns   |                    |
|                |                                                                                                           |                         |                | BY-R+mCherry vs. BY-R+Gi at 30min         | 0.5564                | ns   |                    |
|                |                                                                                                           |                         |                | Control+mCherry vs. Control+Gi at 2h      | 0.8969                | ns   |                    |
|                |                                                                                                           |                         |                | Control+mCherry vs. BY-R+mCherry at 2h    | 0.7989                | ns   |                    |
|                |                                                                                                           |                         |                | Control+mCherry vs. BY-R+Gi at 2h         | 0.8917                | ns   |                    |
|                |                                                                                                           |                         |                | Control+Gi vs. BY-R+mCherry at 2h         | 0.6983                | ns   |                    |

|                |                                                                                                            |                         |                |                                           |                       |      |                    |
|----------------|------------------------------------------------------------------------------------------------------------|-------------------------|----------------|-------------------------------------------|-----------------------|------|--------------------|
|                |                                                                                                            |                         |                | Control+Gi vs. BY-R+Gi at 2h              | 0.9825                | ns   |                    |
|                |                                                                                                            |                         |                | BY-R+mCherry vs. BY-R+Gi at 2h            | 0.6589                | ns   |                    |
|                |                                                                                                            |                         |                | Control+mCherry vs. Control+Gi at 6h      | 0.9537                | ns   |                    |
|                |                                                                                                            |                         |                | Control+mCherry vs. BY-R+mCherry at 6h    | 0.7247                | ns   |                    |
|                |                                                                                                            |                         |                | Control+mCherry vs. BY-R+Gi at 6h         | 0.9440                | ns   |                    |
|                |                                                                                                            |                         |                | Control+Gi vs. BY-R+mCherry at 6h         | 0.9375                | ns   |                    |
|                |                                                                                                            |                         |                | Control+Gi vs. BY-R+Gi at 6h              | 0.8411                | ns   |                    |
|                |                                                                                                            |                         |                | BY-R+mCherry vs. BY-R+Gi at 6h            | 0.6062                | ns   |                    |
| <b>Fig. 6i</b> | Control+mCherry, n = 10 mice<br>Control+Gq, n = 9 mice<br>BY-S+mCherry, n = 13 mice<br>BY-S+Gq, n = 6 mice | <i>Two-way RM ANOVA</i> | <i>Tukey's</i> | Group × time interaction                  | $6.0 \times 10^{-14}$ | **** | F (9, 102) = 13.41 |
|                |                                                                                                            |                         |                | Control+mCherry vs. Control+Gq at BL      | 0.9798                | ns   |                    |
|                |                                                                                                            |                         |                | Control+mCherry vs. BY-S+mCherry at BL    | 0.9968                | ns   |                    |
|                |                                                                                                            |                         |                | Control+mCherry vs. BY-S+Gq at BL         | 0.3428                | ns   |                    |
|                |                                                                                                            |                         |                | Control+Gq vs. BY-S+mCherry at BL         | 0.8977                | ns   |                    |
|                |                                                                                                            |                         |                | Control+Gq vs. BY-S+Gq at BL              | 0.5584                | ns   |                    |
|                |                                                                                                            |                         |                | BY-S+mCherry vs. BY-S+Gq at BL            | 0.0647                | ns   |                    |
|                |                                                                                                            |                         |                | Control+mCherry vs. Control+Gq at 30min   | 0.9712                | ns   |                    |
|                |                                                                                                            |                         |                | Control+mCherry vs. BY-S+mCherry at 30min | $2.0 \times 10^{-5}$  | **** |                    |
|                |                                                                                                            |                         |                | Control+mCherry vs. BY-S+Gq at 30min      | 0.5828                | ns   |                    |
|                |                                                                                                            |                         |                | Control+Gq vs. BY-S+mCherry at 30min      | $4.1 \times 10^{-5}$  | **** |                    |
|                |                                                                                                            |                         |                | Control+Gq vs. BY-S+Gq at 30min           | 0.7401                | ns   |                    |
|                |                                                                                                            |                         |                | BY-S+mCherry vs. BY-S+Gq at 30min         | 0.0077                | **   |                    |
|                |                                                                                                            |                         |                | Control+mCherry vs. Control+Gq at 2h      | 0.8931                | ns   |                    |
|                |                                                                                                            |                         |                | Control+mCherry vs. BY-S+mCherry at 2h    | $5.1 \times 10^{-5}$  | **** |                    |
|                |                                                                                                            |                         |                | Control+mCherry vs. BY-S+Gq at 2h         | 0.0107                | *    |                    |
|                |                                                                                                            |                         |                | Control+Gq vs. BY-S+mCherry at 2h         | 0.0004                | ***  |                    |

|                |                                                                                                          |                         |                |                                           |        |     |                   |
|----------------|----------------------------------------------------------------------------------------------------------|-------------------------|----------------|-------------------------------------------|--------|-----|-------------------|
|                |                                                                                                          |                         |                | Control+Gq vs. BY-S+Gq at 2h              | 0.0377 | *   |                   |
|                |                                                                                                          |                         |                | BY-S+mCherry vs. BY-S+Gq at 2h            | 0.3454 | ns  |                   |
|                |                                                                                                          |                         |                | Control+mCherry vs. Control+Gq at 6h      | 0.9816 | ns  |                   |
|                |                                                                                                          |                         |                | Control+mCherry vs. BY-S+mCherry at 6h    | 0.0012 | **  |                   |
|                |                                                                                                          |                         |                | Control+mCherry vs. BY-S+Gq at 6h         | 0.0187 | *   |                   |
|                |                                                                                                          |                         |                | Control+Gq vs. BY-S+mCherry at 6h         | 0.0010 | **  |                   |
|                |                                                                                                          |                         |                | Control+Gq vs. BY-S+Gq at 6h              | 0.0098 | **  |                   |
|                |                                                                                                          |                         |                | BY-S+mCherry vs. BY-S+Gq at 6h            | 0.2355 | ns  |                   |
| <b>Fig. 6j</b> | Control+mCherry, n = 10 mice<br>Control+Gi, n = 9 mice<br>BYR+mCherry, n = 7 mice<br>BY-R+Gi, n = 3 mice | <i>Two-way RM ANOVA</i> | <i>Tukey's</i> | Group × time interaction                  | 0.3280 | ns  | F (9, 75) = 1.168 |
|                |                                                                                                          |                         |                | Control+mCherry vs. Control+Gi at BL      | 0.8698 | ns  |                   |
|                |                                                                                                          |                         |                | Control+mCherry vs. BY-R+mCherry at BL    | 0.9220 | ns  |                   |
|                |                                                                                                          |                         |                | Control+mCherry vs. BY-R+Gi at BL         | 0.7184 | ns  |                   |
|                |                                                                                                          |                         |                | Control+Gi vs. BY-R+mCherry at BL         | 0.5620 | ns  |                   |
|                |                                                                                                          |                         |                | Control+Gi vs. BY-R+Gi at BL              | 0.9945 | ns  |                   |
|                |                                                                                                          |                         |                | BY-R+mCherry vs. BY-R+Gi at BL            | 0.4154 | ns  |                   |
|                |                                                                                                          |                         |                | Control+mCherry vs. Control+Gi at 30min   | 0.9218 | ns  |                   |
|                |                                                                                                          |                         |                | Control+mCherry vs. BY-R+mCherry at 30min | 0.8939 | ns  |                   |
|                |                                                                                                          |                         |                | Control+mCherry vs. BY-R+Gi at 30min      | 0.0016 | **  |                   |
|                |                                                                                                          |                         |                | Control+Gi vs. BY-R+mCherry at 30min      | 0.9994 | ns  |                   |
|                |                                                                                                          |                         |                | Control+Gi vs. BY-R+Gi at 30min           | 0.0008 | *** |                   |
|                |                                                                                                          |                         |                | BY-R+mCherry vs. BY-R+Gi at 30min         | 0.0019 | **  |                   |
|                |                                                                                                          |                         |                | Control+mCherry vs. Control+Gi at 2h      | 0.8923 | ns  |                   |
|                |                                                                                                          |                         |                | Control+mCherry vs. BY-R+mCherry at 2h    | 0.9939 | ns  |                   |
|                |                                                                                                          |                         |                | Control+mCherry vs. BY-R+Gi at 2h         | 0.6006 | ns  |                   |
|                |                                                                                                          |                         |                | Control+Gi vs. BY-R+mCherry at 2h         | 0.9931 | ns  |                   |

|                               |                                                                     |                                  |                |                                        |                       |      |                     |
|-------------------------------|---------------------------------------------------------------------|----------------------------------|----------------|----------------------------------------|-----------------------|------|---------------------|
|                               |                                                                     |                                  |                | Control+Gi vs. BY-R+Gi at 2h           | 0.7388                | ns   |                     |
|                               |                                                                     |                                  |                | BY-R+mCherry vs. BY-R+Gi at 2h         | 0.7039                | ns   |                     |
|                               |                                                                     |                                  |                | Control+mCherry vs. Control+Gi at 6h   | 0.9897                | ns   |                     |
|                               |                                                                     |                                  |                | Control+mCherry vs. BY-R+mCherry at 6h | 0.9971                | ns   |                     |
|                               |                                                                     |                                  |                | Control+mCherry vs. BY-R+Gi at 6h      | >0.9999               | ns   |                     |
|                               |                                                                     |                                  |                | Control+Gi vs. BY-R+mCherry at 6h      | 0.9468                | ns   |                     |
|                               |                                                                     |                                  |                | Control+Gi vs. BY-R+Gi at 6h           | 0.9915                | ns   |                     |
|                               |                                                                     |                                  |                | BY-R+mCherry vs. BY-R+Gi at 6h         | 0.9943                | ns   |                     |
| <b>Supplementary Fig. 10c</b> | Gq-saline, n = 12 slices<br>Gq-CNO, n = 11 slices                   | <i>Mann-Whitney test</i>         |                |                                        | $1.5 \times 10^{-6}$  | **** | U = 0               |
| <b>Supplementary Fig. 10e</b> | Gi-saline, n = 8 slices<br>Gi-CNO, n = 9 slices                     | <i>Unpaired Two-sided t-test</i> |                |                                        | $2.7 \times 10^{-5}$  | **** | t (15) = 5.935      |
| <b>Supplementary Fig. 11c</b> | Gq-saline, n = 10 slices<br>Gq-CNO, n = 9 slices                    | <i>Unpaired Two-sided t-test</i> |                |                                        | $6.1 \times 10^{-13}$ | **** | t (17) = 19.15      |
| <b>Supplementary Fig. 11e</b> | Gi-saline, n = 10 slices<br>Gi-CNO, n = 9 slices                    | <i>Unpaired Two-sided t-test</i> |                |                                        | 0.0023                | **   | t (17) = 3.580      |
| <b>Supplementary Fig. 12b</b> | Control, n = 10 mice<br>BY+mCherry, n = 8 mice<br>BY+Gi, n = 8 mice | <i>Two-way RM ANOVA</i>          | <i>Tukey's</i> | Group × time interaction               | 0.0333                | *    | F (10, 115) = 2.060 |
|                               |                                                                     |                                  |                | Control vs. BY+mCherry at BL           | 0.9177                | ns   |                     |
|                               |                                                                     |                                  |                | Control vs. BY+Gi at BL                | 0.8625                | ns   |                     |
|                               |                                                                     |                                  |                | BY+mCherry vs. BY+Gi at BL             | 0.5702                | ns   |                     |
|                               |                                                                     |                                  |                | Control vs. BY+mCherry at 30min        | 0.1213                | ns   |                     |
|                               |                                                                     |                                  |                | Control vs. BY+Gi at 30min             | 0.0034                | **   |                     |
|                               |                                                                     |                                  |                | BY+mCherry vs. BY+Gi at 30min          | 0.4342                | ns   |                     |
|                               |                                                                     |                                  |                | Control vs. BY+mCherry at 2h           | 0.9323                | ns   |                     |
|                               |                                                                     |                                  |                | Control vs. BY+Gi at 2h                | 0.0981                | ns   |                     |
|                               |                                                                     |                                  |                | BY+mCherry vs. BY+Gi at 2h             | 0.3150                | ns   |                     |



|                               |                                                                     |                         |                |                                 |         |    |                     |
|-------------------------------|---------------------------------------------------------------------|-------------------------|----------------|---------------------------------|---------|----|---------------------|
|                               |                                                                     |                         |                | Control vs. BY+mCherry at 6h    | >0.9999 | ns |                     |
|                               |                                                                     |                         |                | Control vs. BY+Gi at 6h         | 0.1897  | ns |                     |
|                               |                                                                     |                         |                | BY+mCherry vs. BY+Gi at 6h      | 0.1967  | ns |                     |
|                               |                                                                     |                         |                | Control vs. BY+mCherry at 12h   | 0.7113  | ns |                     |
|                               |                                                                     |                         |                | Control vs. BY+Gi at 12h        | 0.2391  | ns |                     |
|                               |                                                                     |                         |                | BY+mCherry vs. BY+Gi at 12h     | 0.8610  | ns |                     |
|                               |                                                                     |                         |                | Control vs. BY+mCherry at 24h   | 0.6217  | ns |                     |
|                               |                                                                     |                         |                | Control vs. BY+Gi at 24h        | 0.9820  | ns |                     |
|                               |                                                                     |                         |                | BY+mCherry vs. BY+Gi at 24h     | 0.6524  | ns |                     |
| <b>Supplementary Fig. 12c</b> | Control, n = 10 mice<br>BY+mCherry, n = 8 mice<br>BY+Gi, n = 8 mice | <i>Two-way RM ANOVA</i> | <i>Tukey's</i> | Group × time interaction        | 0.3361  | ns | F (10, 125) = 1.143 |
|                               |                                                                     |                         |                | Control vs. BY+mCherry at BL    | 0.9177  | ns |                     |
|                               |                                                                     |                         |                | Control vs. BY+Gi at BL         | 0.9650  | ns |                     |
|                               |                                                                     |                         |                | BY+mCherry vs. BY+Gi at BL      | 0.9799  | ns |                     |
|                               |                                                                     |                         |                | Control vs. BY+mCherry at 30min | 0.1213  | ns |                     |
|                               |                                                                     |                         |                | Control vs. BY+Gi at 30min      | 0.2915  | ns |                     |
|                               |                                                                     |                         |                | BY+mCherry vs. BY+Gi at 30min   | 0.7966  | ns |                     |
|                               |                                                                     |                         |                | Control vs. BY+mCherry at 2h    | 0.9323  | ns |                     |
|                               |                                                                     |                         |                | Control vs. BY+Gi at 2h         | 0.5717  | ns |                     |
|                               |                                                                     |                         |                | BY+mCherry vs. BY+Gi at 2h      | 0.8832  | ns |                     |
|                               |                                                                     |                         |                | Control vs. BY+mCherry at 6h    | >0.9999 | ns |                     |
|                               |                                                                     |                         |                | Control vs. BY+Gi at 6h         | 0.0835  | ns |                     |
|                               |                                                                     |                         |                | BY+mCherry vs. BY+Gi at 6h      | 0.0924  | ns |                     |
|                               |                                                                     |                         |                | Control vs. BY+mCherry at 12h   | 0.7113  | ns |                     |
|                               |                                                                     |                         |                | Control vs. BY+Gi at 12h        | 0.4584  | ns |                     |
|                               |                                                                     |                         |                | BY+mCherry vs. BY+Gi at 12h     | 0.9771  | ns |                     |
|                               |                                                                     |                         |                | Control vs. BY+mCherry at 24h   | 0.6217  | ns |                     |

|                               |                                                                                                         |                                |                |                                     |                      |      |                   |
|-------------------------------|---------------------------------------------------------------------------------------------------------|--------------------------------|----------------|-------------------------------------|----------------------|------|-------------------|
|                               |                                                                                                         |                                |                | Control vs. BY+Gi at 24h            | 0.8138               | ns   |                   |
|                               |                                                                                                         |                                |                | BY+mCherry vs. BY+Gi at 24h         | 0.9595               | ns   |                   |
| <b>Supplementary Fig. 13a</b> | n = 15 mice                                                                                             | <i>Two-sided Friedman test</i> | <i>Dunn's</i>  | Summary                             | $6.0 \times 10^{-6}$ | **** | Q = 24.03         |
|                               |                                                                                                         |                                |                | BL vs. Pre                          | $3.9 \times 10^{-6}$ | **** |                   |
|                               |                                                                                                         |                                |                | BL vs. CNO                          | 0.0140               | *    |                   |
|                               |                                                                                                         |                                |                | Pre vs. CNO                         | 0.1338               | ns   |                   |
| <b>Supplementary Fig. 13b</b> | n = 9 mice                                                                                              | <i>Two-sided Friedman test</i> | <i>Dunn's</i>  | Summary                             | $7.1 \times 10^{-6}$ | **** | Q = 14.80         |
|                               |                                                                                                         |                                |                | BL vs. Pre                          | 0.0008               | ***  |                   |
|                               |                                                                                                         |                                |                | BL vs. CNO                          | >0.9999              | ns   |                   |
|                               |                                                                                                         |                                |                | Pre vs. CNO                         | 0.0201               | *    |                   |
| <b>Supplementary Fig. 15b</b> | ACSF, n = 5 cells/4 mice<br>ACSF+D1/D2 antagonist, n = 5 cells/ 4 mice<br>ACSF+NBQX, n = 5 cells/4 mice | <i>One-way ANOVA</i>           | <i>Tukey's</i> | Main effect of group                | 0.0052               | **   | F (2, 12) = 8.395 |
|                               |                                                                                                         |                                |                | ACSF vs. ACSF+D1/D2 antagonist      | >0.9999              | ns   |                   |
|                               |                                                                                                         |                                |                | ACSF vs. ACSF+NBQX                  | 0.0111               | *    |                   |
|                               |                                                                                                         |                                |                | ACSF+D1/D2 antagonist vs. ACSF+NBQX | 0.0131               | *    |                   |
| <b>Supplementary Fig. 15c</b> | ACSF, n = 5 cells/4 mice<br>ACSF+D1/D2 antagonist, n = 5 cells/ 4 mice<br>ACSF+NBQX, n = 5 cells/4 mice | <i>One-way ANOVA</i>           | <i>Tukey's</i> | Main effect of group                | 0.0002               | ***  | F (2, 12) = 19.73 |
|                               |                                                                                                         |                                |                | ACSF vs. ACSF+D1/D2 antagonist      | >0.9999              | ns   |                   |
|                               |                                                                                                         |                                |                | ACSF vs. ACSF+NBQX                  | 0.0134               | *    |                   |
|                               |                                                                                                         |                                |                | ACSF+D1/D2 antagonist vs. ACSF+NBQX | 0.0075               | **   |                   |
